# Supplementary material
Source: publisher site journal article supplement (https://www.dovepress.com/article/477846)
Supplement: Supplementary file 1 [file get_supplementary_file.php]

**
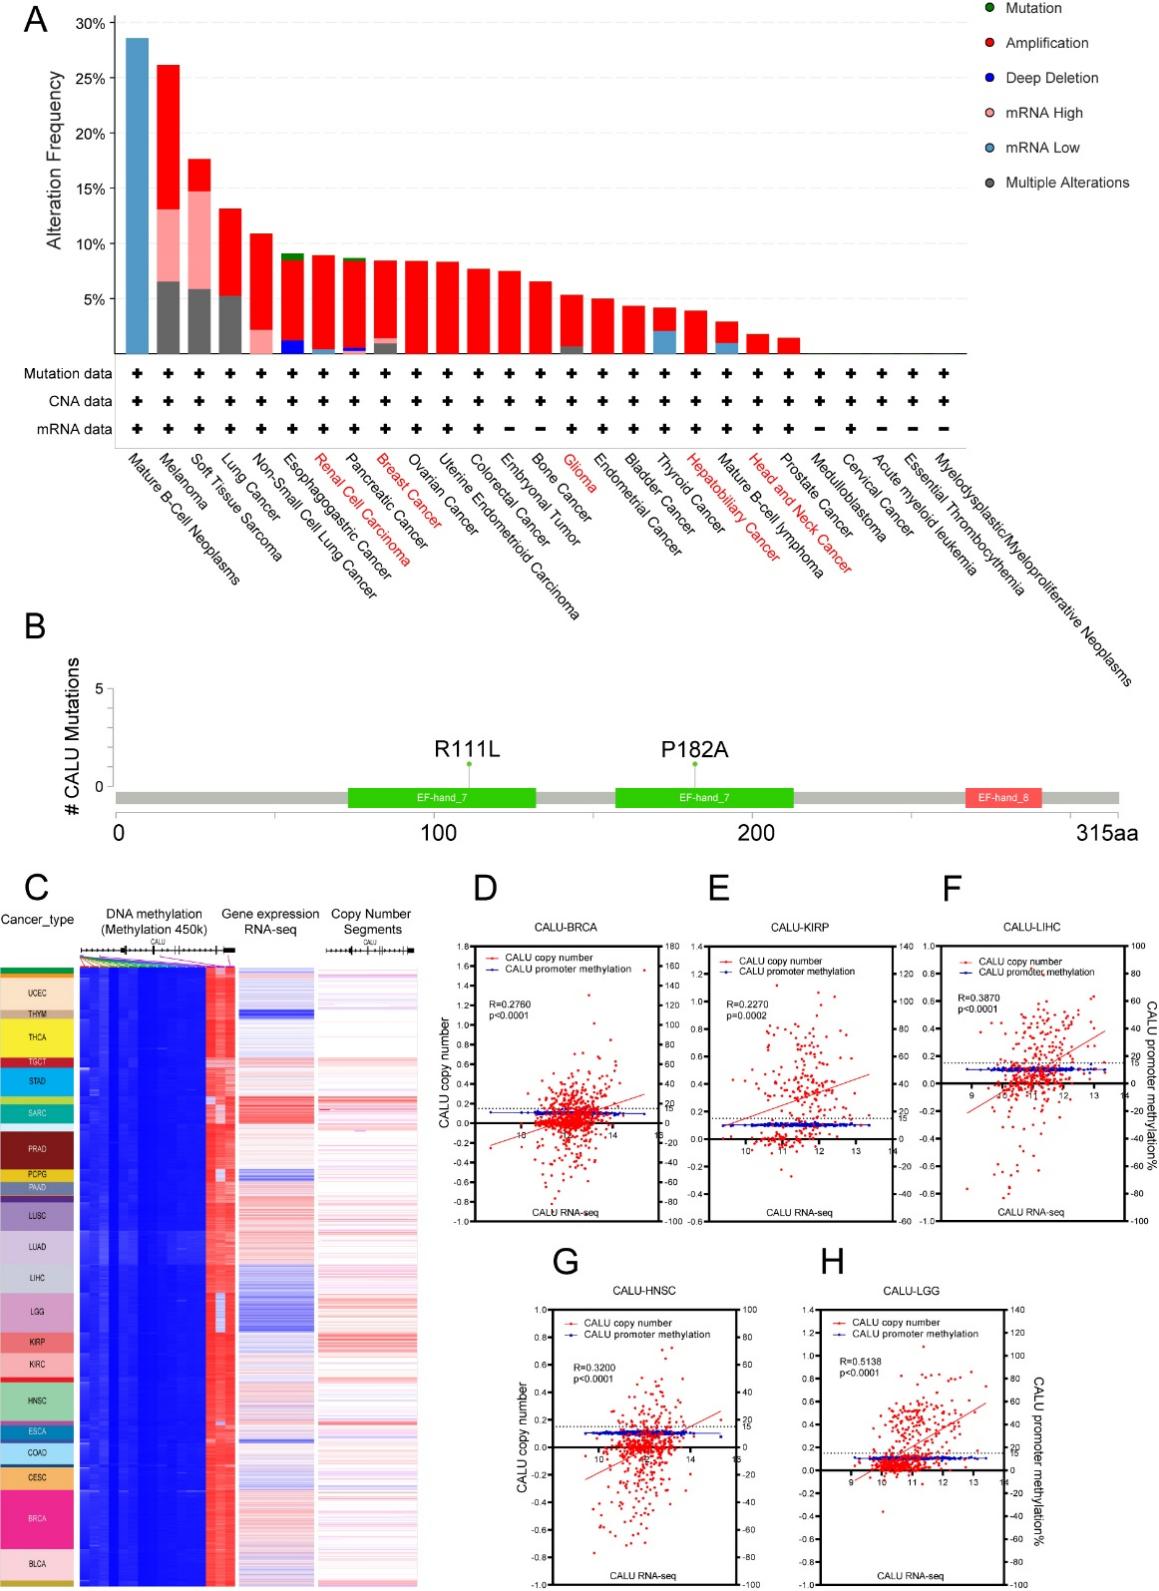
**

**Supplementary Figure 1:** Gene Mutation, Methylation, and Gene Copy Number Analysis of CALU in Different Tumors. Analysis of CALU gene variation in various tumors (A), investigation of CALU gene mutation sites (B). Heatmap depicting the correlation between CALU expression and CALU methylation in 33 tumors from the TCGA database (C). Correlation analyses of CALU mRNA with CALU copy number and CALU promoter methylation in BRCA, KIRP, LIHC, HNSC, and LGG (D-H). The color red represents the analysis of transcription level and copy number correlation, while blue indicates the analysis of transcription level and methylation level correlation. The left Y-axis depicts copy number levels, whereas the right Y-axis illustrates methylation levels.

**
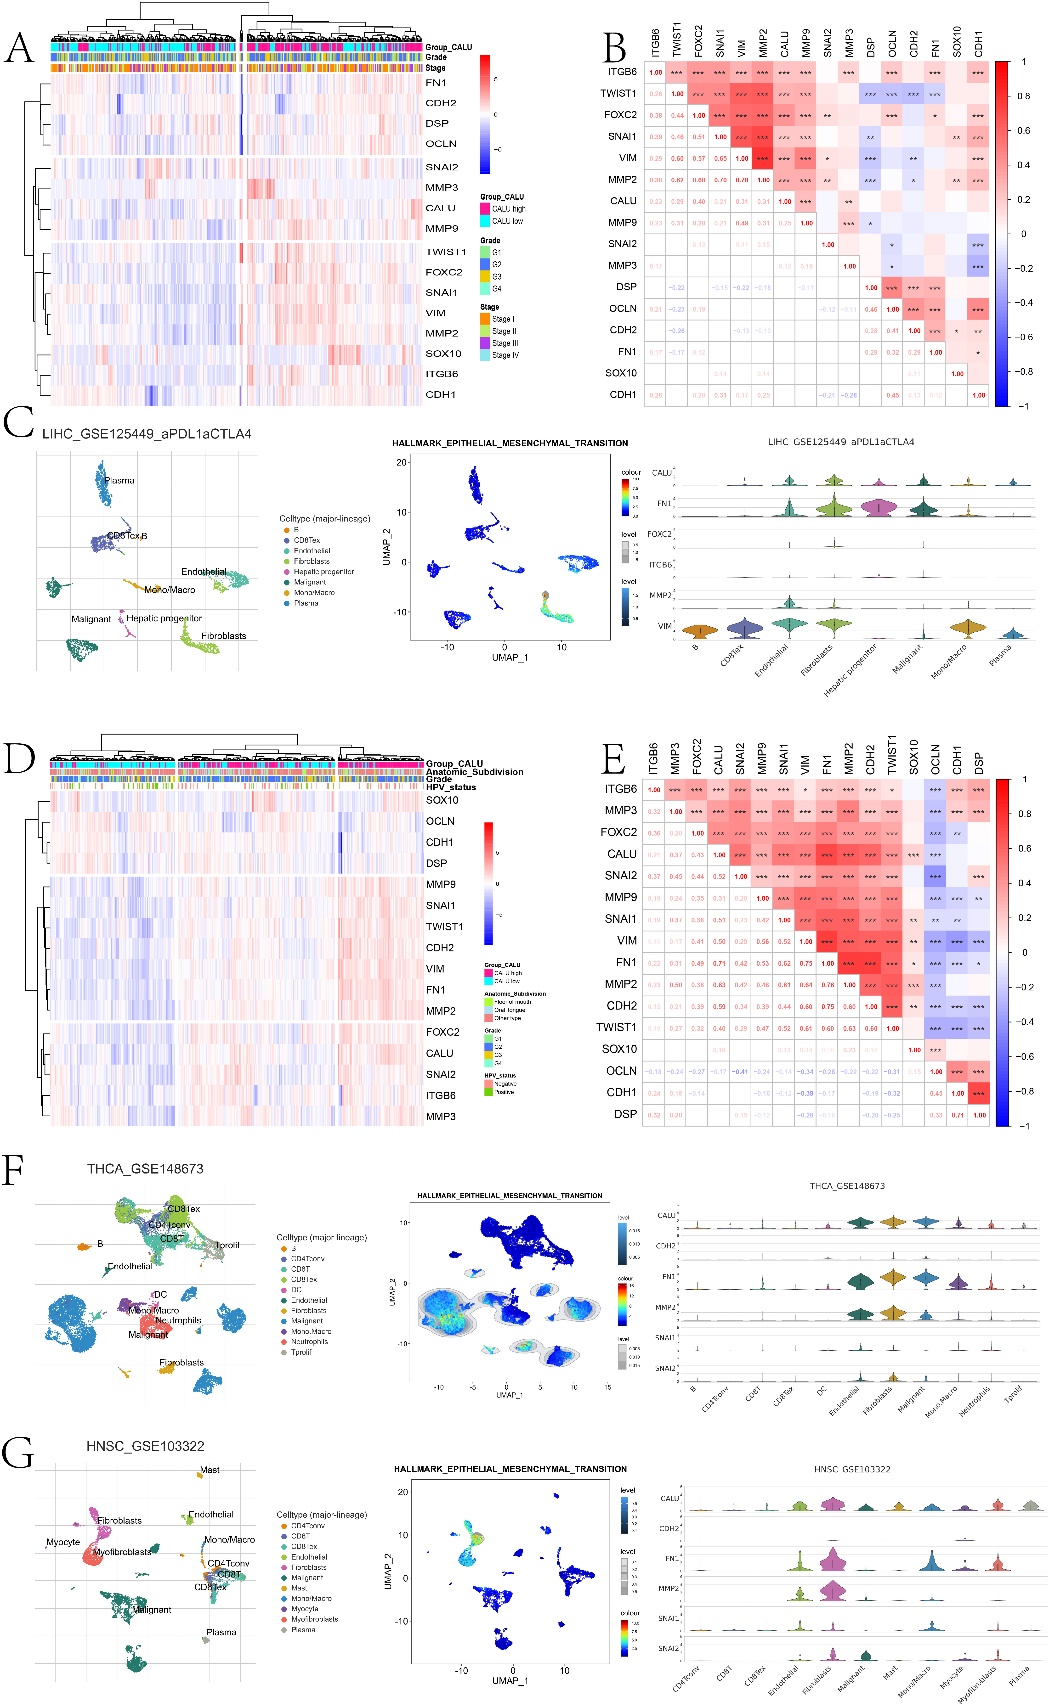
**

**Supplementary Figure 2:** Correlational analysis was conducted to explore the relationship between the expression of CALU and EMT markers in LIHC and HNSC. The cluster heatmaps, depicted as (A-B) and (D-E) respectively, illustrate the expression levels of CALU and 15 EMT markers in LIHC and HNSC. Additionally, (C, F-G) provide insights into the CALU expression in diverse cell types within the two tumor types.

**
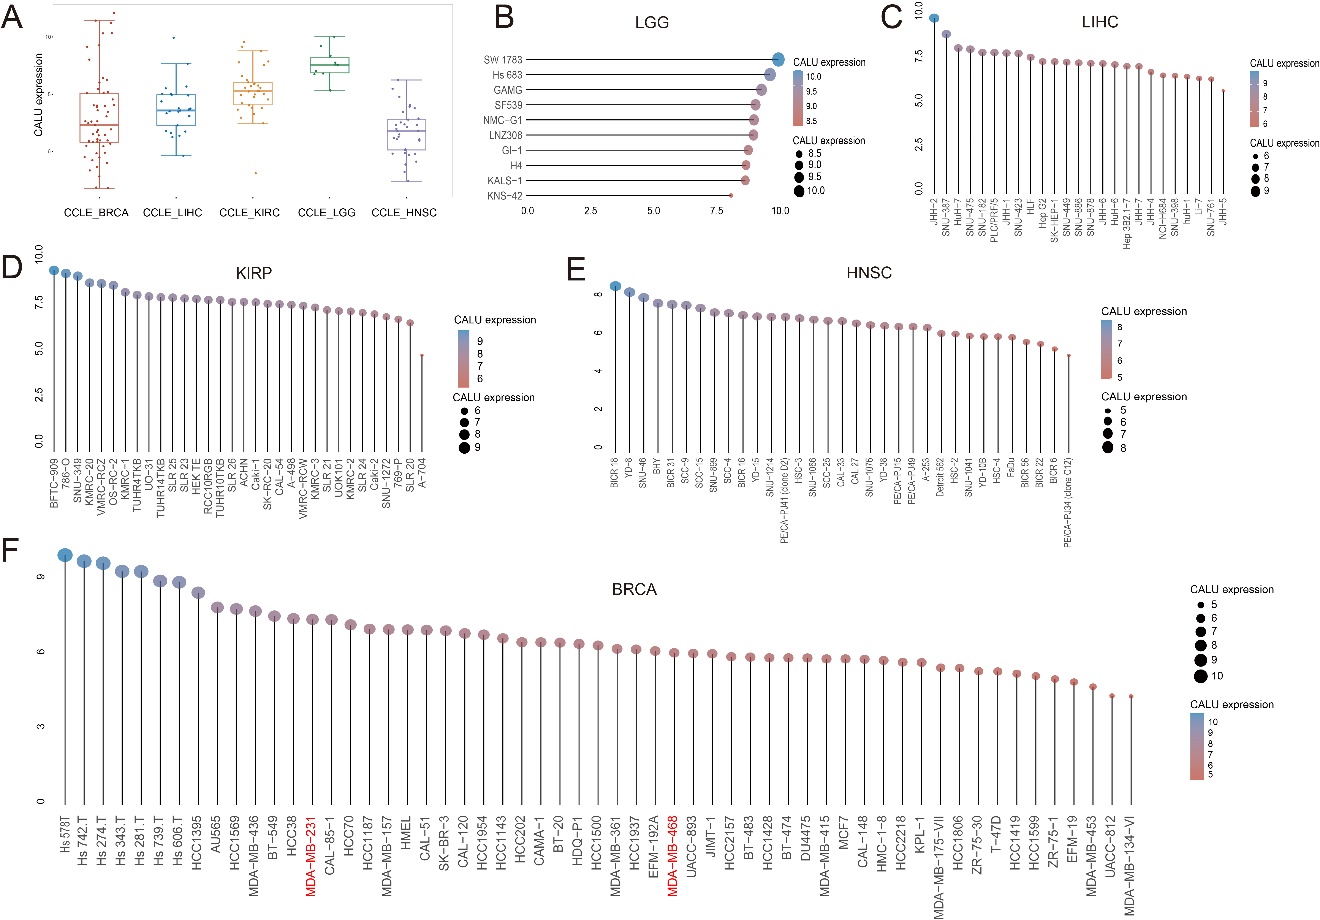
Supplementary Figure 3:** Expression level of CALU in different tumor cell lines in CCLE database. (A) Box plots of different cell lines for 5 tumors. (B-F) indicate expression levels in different cell lines of LGG, LIHC, KIRP, HNSC and BRCA, respectively.

**
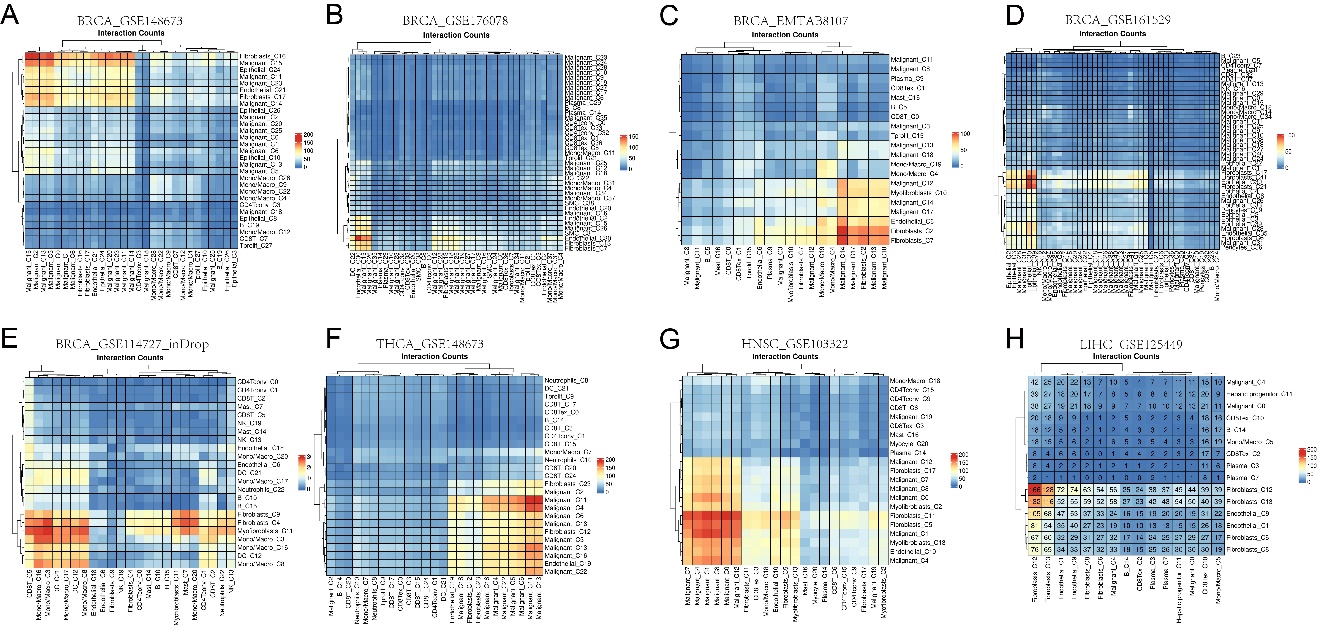
Supplementary Figure 4:** Visualized heat map of different degrees of cell-to-cell communication in 8 single-cell sequencing datasets including BRCA. (A-E) indicates BRCA,(F-G) indicates HNSC, and (H) indicates LIHC.

Supplementary Table1-1: The results of CALU expression difference analysis between tumor tissues and normal tissues on different platforms (GPL570) of GENT2

|  | | |
| --- | --- | --- |
| tissue | P.value | Log2FC |
| Eye | NA | 0.928 |
| Lymph_Node | NA | 0.654 |
| Placenta | NA | NaN |
| Colon | <0.001 | 1.109 |
| Brain | <0.001 | 0.705 |
| All | <0.001 | 0.32 |
| Kidney | <0.001 | 0.848 |
| Skin | <0.001 | 1.465 |
| Lung | <0.001 | 0.518 |
| Breast | <0.001 | 0.438 |
| Ovary | <0.001 | 1.488 |
| Liver | <0.001 | 0.446 |
| Stomach | <0.001 | 1.037 |
| Thyroid | <0.001 | 0.308 |
| Head_and_Neck | <0.001 | 1.398 |
| Adrenal_Gland | <0.001 | 0.967 |
| Bladder | <0.001 | 0.809 |
| Prostate | <0.001 | 0.737 |
| Blood | <0.001 | 0.127 |
| Endometrium | <0.001 | -0.291 |
| Pancreas | <0.001 | 0.381 |
| Uterus | 0.001 | -0.626 |
| Tongue | 0.012 | 0.413 |
| Esophagus | 0.013 | -0.602 |
| Teeth | 0.016 | 0.8 |
| Adipose | 0.038 | 0.238 |
| Bone | 0.042 | -0.292 |
| Oral | 0.057 | -0.82 |
| Small_Intestine | 0.057 | -0.603 |
| Vagina | 0.073 | 0.37 |
| Cervix | 0.128 | 0.445 |
| Testis | 0.139 | 0.507 |
| Vulva | 0.143 | 0.282 |
| Pharynx | 0.293 | 0.44 |
| Spleen | 0.312 | -0.233 |
| Muscle | 0.424 | 0.45 |
| Gallbladder | 0.437 | -0.377 |

Supplementary Table1-2: The results of CALU expression difference analysis between tumor tissues and normal tissues on different platforms (GPL96) of GENT2

| tissue | P.value | Log2FC |
| --- | --- | --- |
| All | <0.001 | 0.574 |
| Adrenal_Gland | <0.001 | 1.163 |
| Bladder | 0.325 | -0.213 |
| Blood | <0.001 | 0.691 |
| Bone_Marrow | <0.001 | 0.288 |
| Brain | <0.001 | 0.296 |
| Breast | <0.001 | 0.573 |
| Cartilage | 0.009 | -1.409 |
| Cervix | <0.001 | 0.66 |
| Colon | <0.001 | 0.425 |
| Esophagus | <0.001 | 0.884 |
| Heart | <0.001 | -2.836 |
| Immune_System | 0.004 | 0.256 |
| Joint | 0.103 | 0.349 |
| Kidney | <0.001 | 0.78 |
| Larynx | 0.328 | 1.503 |
| Liver | <0.001 | 0.436 |
| Lung | <0.001 | 1.132 |
| Muscle | 0.081 | 0.167 |
| Ovary | 0.008 | 0.669 |
| Pancreas | 0.169 | -0.291 |
| Pharynx | 0.368 | 0.419 |
| Prostate | <0.001 | 0.592 |
| Skin | 0.213 | 0.279 |
| Small_Intestine | NA | NaN |
| Soft_Tissue | <0.001 | 1.284 |
| Stomach | <0.001 | 0.402 |
| Testis | <0.001 | 1.158 |
| Thyroid | 0.092 | 0.197 |
| Tongue | 0.134 | 0.459 |
| Urothelium | 0.198 | 0.211 |
| Uterus | 0.759 | -0.056 |

| Supplementary Table 2. CALU expression data for 32 different tumor projects as well as methylation data for individual cpg sites located at CALU | UVM | 0.270 | 0.054 | 0.096 | -0.094 | 0.027 | -0.036 | 0.000 | -0.093 | -0.193 | -0.150 | 0.125 | 0.175 | 0.008 | 0.132 | -0.317 | -0.253 | -0.150 | -0.281 |
| --- | --- | --- | --- | --- | --- | --- | --- | --- | --- | --- | --- | --- | --- | --- | --- | --- | --- | --- | --- |
| UCS | 0.407 | -0.036 | -0.405 | -0.020 | -0.218 | 0.113 | 0.210 | -0.259 | -0.388 | -0.225 | -0.097 | 0.094 | -0.113 | -0.013 | 0.011 | -0.200 | -0.047 | -0.143 |
| UCEC | 0.224 | -0.009 | -0.083 | 0.043 | 0.015 | 0.072 | -0.005 | -0.038 | -0.140 | -0.086 | 0.018 | 0.105 | -0.045 | 0.055 | -0.005 | -0.016 | 0.049 | 0.007 |
| THYM | 0.055 | -0.194 | 0.002 | 0.013 | 0.002 | 0.179 | -0.090 | 0.072 | 0.023 | 0.065 | 0.099 | 0.097 | 0.012 | -0.044 | -0.161 | -0.156 | -0.242 | -0.100 |
| THCA | 0.132 | 0.026 | 0.053 | 0.006 | 0.029 | 0.107 | 0.052 | 0.043 | 0.049 | 0.038 | 0.038 | 0.076 | 0.019 | 0.112 | -0.084 | 0.038 | -0.082 | 0.069 |
| TGCT | 0.385 | 0.161 | -0.177 | 0.077 | -0.193 | 0.040 | 0.156 | -0.326 | -0.156 | -0.199 | -0.060 | 0.053 | 0.091 | 0.087 | 0.172 | 0.223 | 0.167 | 0.167 |
| STAD | 0.258 | -0.068 | -0.116 | -0.013 | 0.019 | 0.008 | -0.011 | -0.118 | -0.151 | -0.165 | -0.012 | 0.092 | 0.098 | 0.095 | 0.059 | -0.037 | 0.140 | -0.017 |
| SKCM | 0.566 | 0.181 | -0.282 | -0.062 | -0.096 | 0.143 | -0.030 | -0.215 | -0.329 | -0.235 | -0.251 | 0.268 | -0.099 | 0.321 | -0.393 | 0.005 | 0.201 | -0.392 |
| SARC | 0.463 | 0.000 | -0.081 | 0.005 | -0.082 | 0.093 | -0.009 | -0.210 | -0.223 | -0.216 | -0.024 | 0.042 | -0.113 | 0.038 | -0.206 | -0.265 | 0.144 | -0.236 |
| READ | 0.187 | 0.111 | 0.096 | -0.246 | -0.081 | 0.200 | -0.310 | -0.111 | -0.121 | -0.080 | -0.355 | 0.030 | -0.179 | 0.131 | -0.064 | 0.016 | 0.064 | -0.196 |
| PRAD | 0.229 | 0.121 | -0.198 | 0.076 | -0.060 | 0.116 | -0.071 | -0.128 | -0.169 | -0.072 | -0.002 | 0.125 | -0.065 | 0.048 | 0.213 | 0.177 | 0.144 | 0.069 |
| PCPG | 0.360 | 0.086 | -0.165 | 0.127 | 0.060 | 0.130 | 0.129 | -0.105 | -0.109 | -0.161 | 0.145 | 0.052 | 0.012 | 0.109 | -0.089 | 0.207 | 0.101 | 0.069 |
| PAAD | -0.084 | 0.074 | 0.094 | 0.025 | 0.055 | 0.234 | -0.016 | 0.120 | 0.126 | 0.029 | 0.112 | 0.198 | 0.037 | 0.038 | -0.277 | -0.287 | 0.203 | -0.050 |
| OV | 0.188 | -0.037 | -0.241 | 0.097 | -0.242 | -0.405 | -0.240 | -0.049 | 0.069 | 0.000 | 0.691 | 0.082 | 0.049 | 0.057 | -0.022 | -0.197 | 0.106 | 0.006 |
| MESO | 0.273 | -0.089 | -0.246 | -0.066 | 0.152 | 0.003 | 0.047 | -0.121 | -0.015 | 0.033 | -0.104 | 0.118 | -0.074 | 0.114 | -0.174 | -0.070 | 0.111 | -0.213 |
| LUSC | 0.411 | 0.078 | -0.103 | -0.089 | -0.134 | 0.090 | -0.197 | -0.316 | -0.233 | -0.158 | -0.150 | 0.129 | -0.079 | 0.131 | 0.034 | 0.053 | 0.185 | -0.085 |
| LUAD | 0.429 | 0.144 | -0.084 | -0.145 | 0.114 | 0.018 | -0.176 | 0.040 | -0.030 | 0.000 | -0.093 | 0.089 | 0.001 | 0.162 | -0.203 | 0.064 | 0.339 | -0.130 |
| Cancer type abbreviation | CALU (average) | cg09436892 | cg27031506 | cg04774374 | cg10365046 | cg23475963 | cg01174859 | cg04434696 | cg19426362 | cg08307369 | cg19402173 | cg10313005 | cg05647526 | cg03534322 | cg08742095 | cg06479434 | cg07989042 | CGI-CPRREL |
| Supplementary Table 2. CALU expression data for 32 different tumor projects as well as methylation data for individual cpg sites located at CALU | LIHC | 0.387 | 0.123 | -0.269 | 0.015 | 0.137 | 0.033 | 0.038 | 0.000 | -0.026 | -0.028 | 0.029 | 0.165 | -0.029 | 0.107 | 0.044 | 0.177 | 0.186 | 0.038 |
| LGG | 0.514 | 0.102 | -0.147 | -0.078 | -0.003 | 0.097 | -0.031 | -0.070 | -0.036 | -0.098 | 0.057 | 0.159 | -0.032 | 0.196 | 0.076 | -0.004 | 0.165 | 0.038 |
| KIRP | 0.227 | 0.149 | -0.189 | 0.056 | 0.094 | 0.175 | -0.099 | -0.046 | -0.042 | -0.093 | -0.089 | 0.161 | 0.003 | 0.156 | 0.084 | 0.119 | 0.169 | 0.032 |
| KIRC | 0.342 | -0.003 | -0.146 | 0.159 | -0.055 | 0.151 | 0.097 | -0.097 | -0.176 | -0.059 | -0.007 | 0.035 | -0.060 | 0.136 | -0.193 | 0.015 | 0.057 | -0.054 |
| KICH | 0.281 | 0.069 | -0.245 | 0.121 | -0.020 | 0.137 | -0.024 | -0.197 | -0.150 | -0.293 | -0.284 | 0.070 | -0.040 | -0.048 | -0.363 | -0.379 | 0.075 | -0.381 |
| HNSC | 0.320 | 0.069 | -0.042 | -0.104 | -0.105 | 0.105 | -0.130 | -0.001 | -0.169 | -0.085 | -0.020 | 0.172 | 0.007 | 0.132 | -0.090 | -0.137 | 0.045 | -0.084 |
| GBM | 0.296 | 0.338 | -0.318 | -0.054 | 0.225 | 0.265 | 0.345 | -0.033 | -0.208 | -0.113 | 0.017 | 0.342 | -0.047 | 0.141 | -0.029 | 0.244 | 0.018 | -0.003 |
| ESCA | 0.352 | -0.014 | 0.068 | -0.113 | 0.017 | 0.165 | -0.073 | -0.005 | 0.006 | -0.073 | -0.097 | 0.078 | -0.088 | 0.049 | -0.082 | -0.135 | 0.058 | -0.069 |
| DLBC | 0.245 | -0.108 | -0.232 | -0.071 | 0.047 | -0.150 | -0.155 | -0.216 | -0.208 | -0.195 | -0.146 | -0.514 | -0.361 | 0.170 | 0.139 | 0.273 | -0.113 | 0.040 |
| COAD | 0.129 | 0.066 | 0.043 | 0.004 | 0.047 | 0.067 | -0.048 | 0.054 | 0.018 | 0.055 | 0.080 | 0.112 | 0.039 | 0.124 | -0.140 | -0.123 | -0.126 | -0.015 |
| CHOL | 0.116 | -0.188 | -0.296 | -0.242 | -0.074 | -0.098 | 0.058 | -0.109 | -0.077 | -0.097 | 0.112 | -0.410 | -0.111 | -0.164 | 0.091 | 0.070 | 0.085 | -0.247 |
| CESC | 0.350 | 0.037 | -0.081 | -0.158 | -0.018 | 0.000 | -0.063 | -0.001 | -0.040 | -0.097 | 0.005 | 0.063 | -0.005 | 0.048 | 0.001 | 0.016 | -0.007 | -0.085 |
| BRCA | 0.276 | 0.020 | -0.019 | 0.072 | -0.080 | 0.037 | -0.202 | -0.091 | -0.179 | -0.065 | -0.116 | 0.079 | 0.043 | 0.080 | -0.246 | -0.156 | 0.083 | -0.115 |
| BLCA | 0.260 | 0.082 | -0.071 | -0.015 | 0.025 | 0.068 | -0.028 | -0.123 | -0.103 | -0.066 | -0.088 | 0.116 | -0.005 | 0.125 | -0.091 | -0.152 | 0.000 | -0.061 |
| ACC | 0.585 | 0.128 | -0.394 | -0.032 | -0.153 | 0.136 | 0.030 | -0.396 | -0.364 | -0.426 | -0.008 | 0.114 | 0.017 | 0.002 | -0.178 | 0.179 | 0.319 | -0.235 |
| Cancer type abbreviation | CALU (average) | cg09436892 | cg27031506 | cg04774374 | cg10365046 | cg23475963 | cg01174859 | cg04434696 | cg19426362 | cg08307369 | cg19402173 | cg10313005 | cg05647526 | cg03534322 | cg08742095 | cg06479434 | cg07989042 | CGI-CPRREL |

| Supplementary Table 3: Transcriptome data, methylation data, and copy number data for CALU in 5 different tumor programs | | | | | | | | | | | | | | |
| --- | --- | --- | --- | --- | --- | --- | --- | --- | --- | --- | --- | --- | --- | --- |
| BRCA | | | KIRP | | | LIHC | | | HNSC | | | LGG | | |
| CALU RNA-seq | CALU copy number | CALU promoter methylation | CALU RNA-seq | CALU copy number | CALU promoter methylation | CALU RNA-seq | CALU copy number | CALU promoter methylation | CALU RNA-seq | CALU copy number | CALU promoter methylation | CALU RNA-seq | CALU copy number | CALU promoter methylation |
| 15.38 | 1.556 | 0.092773 | 13.36 | 0.1727 | 0.099649 | 13.36 | 0.0792 | 0.101684 | 15.33 | 0.1984 | 0.076652 | 13.41 | 0.7319 | 0.10518 |
| 14.46 | 0.0774 | 0.099148 | 13.14 | 0.1017 | 0.099869 | 13.33 | 0.154 | 0.099338 | 14.15 | 0.0774 | 0.099572 | 13.13 | 0.1708 | 0.09998 |
| 14.31 | 0.407 | 0.10392 | 12.97 | 0.3317 | 0.099107 | 13.06 | 0.1047 | 0.106263 | 14 | -0.1954 | 0.104096 | 13.05 | 0.5068 | 0.105629 |
| 14.23 | 0.1709 | 0.088305 | 12.88 | 0.5858 | 0.114018 | 13.02 | 0.2737 | 0.104142 | 13.8 | -0.3149 | 0.113822 | 12.93 | 0.8572 | 0.116871 |
| 14.14 | 0.5872 | 0.087521 | 12.87 | 0.1417 | 0.108716 | 13 | 0.4016 | 0.105552 | 13.72 | 0.1618 | 0.098046 | 12.86 | 0.6101 | 0.108994 |
| 14.12 | 0.6283 | 0.09565 | 12.84 | 0.1731 | 0.104042 | 12.99 | 0.6326 | 0.102384 | 13.69 | 0.0682 | 0.104135 | 12.75 | 0.0271 | 0.10468 |
| 14.08 | 0.5325 | 0.102755 | 12.74 | 0.7559 | 0.105661 | 12.9 | 0.6154 | 0.106381 | 13.68 | 0.1858 | 0.115961 | 12.71 | 0.0945 | 0.101327 |
| 14.07 | 0.2023 | 0.078918 | 12.73 | 0.2216 | 0.09599 | 12.9 | 0.4477 | 0.14019 | 13.66 | 0.4975 | 0.107356 | 12.59 | 0.4844 | 0.112742 |
| 13.97 | -0.0157 | 0.105352 | 12.67 | 0.1594 | 0.100603 | 12.86 | 0.0331 | 0.077455 | 13.6 | 0.2219 | 0.101568 | 12.57 | 0.8099 | 0.102352 |
| 13.94 | 0.4377 | 0.101592 | 12.66 | 0.2294 | 0.107473 | 12.8 | 0.2703 | 0.103886 | 13.6 | 0.0002 | 0.086532 | 12.56 | 0.3154 | 0.099235 |
| 13.91 | 0.8466 | 0.100576 | 12.58 | 0.7872 | 0.108324 | 12.67 | 0.0714 | 0.098709 | 13.56 | 0.3247 | 0.101758 | 12.53 | 0.3842 | 0.104263 |
| 13.89 | 0.052 | 0.098362 | 12.58 | 0.5905 | 0.099056 | 12.55 | 0.1063 | 0.106609 | 13.53 | 0.0441 | 0.103345 | 12.51 | 0.418 | 0.103163 |
| 13.84 | 0.3712 | 0.103057 | 12.49 | 0.0172 | 0.102695 | 12.49 | 0.5325 | 0.098934 | 13.46 | 0.342 | 0.106225 | 12.41 | 0.4996 | 0.101514 |
| 13.82 | -0.0181 | 0.098889 | 12.47 | 0.2918 | 0.099034 | 12.49 | 0.5005 | 0.106244 | 13.44 | 0.071 | 0.099137 | 12.4 | 0.7947 | 0.101507 |
| 13.8 | 0.0905 | 0.101934 | 12.47 | 0.2901 | 0.100042 | 12.32 | 0.4789 | 0.10982 | 13.39 | 0.1824 | 0.105029 | 12.4 | 0.5245 | 0.099088 |
| 13.78 | 0.0854 | 0.098233 | 12.44 | 0.1228 | 0.100976 | 12.3 | 0.1792 | 0.104893 | 13.36 | 0.2921 | 0.103566 | 12.39 | 0.3824 | 0.102704 |
| 13.75 | 0.4819 | 0.103312 | 12.42 | 1.034 | 0.095543 | 12.3 | 0.156 | 0.107586 | 13.35 | -0.0099 | 0.103804 | 12.39 | 0.2837 | 0.105425 |
| 13.75 | 0.1593 | 0.09815 | 12.42 | 0.2294 | 0.102292 | 12.28 | 0 | 0.099762 | 13.31 | -0.0203 | 0.1045 | 12.37 | 0.3608 | 0.110275 |
| 13.73 | 0.3511 | 0.08645 | 12.41 | 0.4139 | 0.094823 | 12.27 | 0.267 | 0.097694 | 13.3 | 0.071 | 0.102396 | 12.34 | 0.4096 | 0.105014 |
| 13.73 | 0.1504 | 0.10461 | 12.36 | 0.3528 | 0.101846 | 12.26 | 0.4483 | 0.105679 | 13.21 | 0.0105 | 0.108535 | 12.3 | 0.6098 | 0.102763 |
| 13.73 | 0.0136 | 0.092866 | 12.35 | 0.419 | 0.102662 | 12.26 | 0.4317 | 0.116575 | 13.21 | 0.0042 | 0.101405 | 12.28 | 0.3413 | 0.103645 |
| 13.72 | -0.0601 | 0.107345 | 12.35 | 0.3357 | 0.105718 | 12.23 | 0.2009 | 0.097249 | 13.19 | 0.722 | 0.098893 | 12.27 | 0.7984 | 0.104818 |
| 13.7 | 0.2768 | 0.102825 | 12.3 | 0.2128 | 0.102038 | 12.23 | -0.1164 | 0.109302 | 13.19 | 0.1092 | 0.096289 | 12.26 | 0.4098 | 0.100482 |
| 13.69 | 0.1567 | 0.105655 | 12.28 | 0.0345 | 0.101126 | 12.2 | 0.043 | 0.104388 | 13.18 | 0.0395 | 0.106922 | 12.24 | 0.0012 | 0.104774 |
| 13.68 | 0.3983 | 0.097782 | 12.27 | 0.3538 | 0.106856 | 12.18 | 0.4229 | 0.099195 | 13.18 | -0.0046 | 0.106392 | 12.21 | 0.4897 | 0.095697 |
| 13.68 | -0.1448 | 0.15033 | 12.22 | 0.5416 | 0.105655 | 12.18 | 0.0322 | 0.102605 | 13.16 | -0.0534 | 0.100235 | 12.21 | 0.1724 | 0.109664 |
| 13.66 | 0.2894 | 0.100195 | 12.21 | 0.4207 | 0.100954 | 12.16 | 0.4024 | 0.103912 | 13.14 | 0.1476 | 0.102585 | 12.2 | 0.396 | 0.111705 |
| 13.61 | 0.278 | 0.100929 | 12.2 | 0.7433 | 0.10438 | 12.16 | 0.2213 | 0.105335 | 13.14 | 0.052 | 0.096241 | 12.18 | 0.7807 | 0.104178 |
| 13.61 | 0.0746 | 0.101403 | 12.2 | 0.3499 | 0.104083 | 12.14 | 0.4905 | 0.101738 | 13.14 | 0.0154 | 0.115035 | 12.13 | 0.1475 | 0.103188 |
| 13.55 | 0.0283 | 0.098153 | 12.17 | 0.4147 | 0.100266 | 12.09 | 0.4758 | 0.109899 | 13.12 | 0.1449 | 0.100278 | 12.12 | 0.2451 | 0.111059 |
| 13.54 | 0.4783 | 0.102612 | 12.17 | 0.3165 | 0.09172 | 12.08 | 0.0326 | 0.093288 | 13.12 | -0.0028 | 0.107065 | 12.1 | 0.0582 | 0.107992 |
| 13.52 | 0.271 | 0.104141 | 12.15 | 0.2117 | 0.105718 | 12.07 | 0.3975 | 0.103231 | 13.12 | -0.4135 | 0.102787 | 12.05 | 0.3794 | 0.114585 |
| 13.51 | 0.101 | 0.095538 | 12.14 | 0.1715 | 0.104108 | 12.04 | 0.5203 | 0.100949 | 13.1 | 0.2496 | 0.104234 | 12.03 | 0.5123 | 0.103358 |
| 13.51 | 0.0319 | 0.099624 | 12.12 | 0.5453 | 0.104785 | 12.03 | 0.3288 | 0.099682 | 13.1 | 0.2082 | 0.09858 | 12.02 | 0.4979 | 0.109642 |
| 13.51 | 0.0145 | 0.093776 | 12.1 | 0.3907 | 0.107627 | 12.01 | 0.4235 | 0.106444 | 13.1 | 0.1821 | 0.097812 | 12 | 0.4396 | 0.106769 |
| 13.49 | 0.3345 | 0.106925 | 12.1 | 0.3806 | 0.103924 | 11.98 | 0.4485 | 0.099025 | 13.1 | 0.0313 | 0.107426 | 11.99 | 0.3795 | 0.101244 |
| 13.48 | 0.0941 | 0.105228 | 12.09 | 0.5499 | 0.100225 | 11.98 | -0.0094 | 0.102705 | 13.1 | 0.0094 | 0.11411 | 11.98 | 0.4992 | 0.118541 |
| 13.48 | -0.1153 | 0.098338 | 12.09 | 0.106 | 0.103096 | 11.97 | 0.0642 | 0.107351 | 13.1 | -0.007 | 0.106453 | 11.98 | 0.2041 | 0.107873 |
| 13.47 | 0.3003 | 0.104604 | 12.08 | 0.4044 | 0.102096 | 11.97 | -0.0399 | 0.097073 | 13.09 | 0.0712 | 0.107979 | 11.97 | 0.5643 | 0.08323 |
| 13.45 | 0.3225 | 0.100853 | 12.05 | 0.9739 | 0.100259 | 11.96 | 0.2845 | 0.102388 | 13.09 | 0.0558 | 0.097417 | 11.95 | 0.0126 | 0.107388 |
| 13.43 | 0.6587 | 0.095156 | 12.05 | 0.6268 | 0.105627 | 11.95 | 0.2433 | 0.097591 | 13.08 | -0.0456 | 0.102167 | 11.88 | 0.8364 | 0.108382 |
| 13.43 | 0.4554 | 0.106838 | 12.04 | 0.2125 | 0.103593 | 11.95 | -0.0098 | 0.103998 | 13.08 | -0.2304 | 0.107525 | 11.87 | 0.322 | 0.102569 |
| 13.38 | 0.074 | 0.100018 | 12.02 | 0.0416 | 0.103392 | 11.93 | 0.0278 | 0.107975 | 13.07 | 0.179 | 0.105058 | 11.87 | 0.061 | 0.101444 |
| 13.37 | 0.0298 | 0.096852 | 12.01 | 0.5557 | 0.096152 | 11.92 | 0.216 | 0.108933 | 13.07 | 0.1759 | 0.094382 | 11.87 | 0.0417 | 0.106368 |
| 13.36 | 0.6764 | 0.105718 | 12.01 | 0.3378 | 0.098643 | 11.91 | 0.0676 | 0.100441 | 13.06 | -0.0379 | 0.095439 | 11.85 | 0.3999 | 0.0991 |
| 13.36 | 0.1659 | 0.102163 | 12 | 0.3892 | 0.101718 | 11.9 | 0.3 | 0.10132 | 13.05 | -0.0199 | 0.10253 | 11.85 | 0.0974 | 0.110159 |
| 13.35 | 0.1362 | 0.110271 | 12 | 0.201 | 0.104327 | 11.9 | 0.0269 | 0.103621 | 13.04 | 0.0403 | 0.097852 | 11.84 | 0.1612 | 0.116215 |
| 13.34 | 0.2534 | 0.097005 | 11.98 | 1.064 | 0.097087 | 11.9 | -0.0002 | 0.102188 | 13.04 | -0.0016 | 0.104178 | 11.82 | 0.5458 | 0.104997 |
| 13.34 | 0.0715 | 0.107405 | 11.98 | 0.2363 | 0.101645 | 11.89 | -0.0218 | 0.108298 | 13.01 | 0.1487 | 0.106937 | 11.81 | 0.6785 | 0.104863 |
| 13.33 | 0.3015 | 0.101128 | 11.96 | 0.6762 | 0.10058 | 11.88 | 0.2609 | 0.104685 | 13.01 | 0.1472 | 0.097193 | 11.8 | 0.6766 | 0.114544 |
| 13.32 | 0.1278 | 0.095809 | 11.96 | 0.3408 | 0.113705 | 11.88 | 0.1735 | 0.109633 | 13 | -0.3118 | 0.108001 | 11.8 | 0.1025 | 0.104836 |
| 13.32 | 0.119 | 0.149345 | 11.96 | 0.1621 | 0.100651 | 11.88 | -0.2461 | 0.093746 | 12.99 | 0.1489 | 0.098112 | 11.79 | 0.074 | 0.102795 |
| 13.31 | 0.0884 | 0.102097 | 11.95 | 0.3601 | 0.105096 | 11.86 | 0.1292 | 0.100592 | 12.96 | -0.1129 | 0.111242 | 11.78 | 0.5614 | 0.104607 |
| 13.31 | 0.0526 | 0.10496 | 11.95 | 0.3215 | 0.102422 | 11.86 | -0.1344 | 0.097802 | 12.94 | 0.145 | 0.103488 | 11.78 | 0.3492 | 0.100721 |
| 13.29 | 0.1375 | 0.098612 | 11.95 | 0.0809 | 0.112414 | 11.85 | 0.3871 | 0.099388 | 12.94 | 0.127 | 0.099468 | 11.78 | 0.3153 | 0.103494 |
| 13.28 | 0.1352 | 0.09923 | 11.94 | 0.8966 | 0.109822 | 11.85 | 0.1832 | 0.101725 | 12.93 | 0.2717 | 0.107703 | 11.78 | 0.2976 | 0.104089 |
| 13.28 | 0.1067 | 0.102075 | 11.93 | 0.5185 | 0.113037 | 11.81 | 0.203 | 0.102662 | 12.93 | -0.3138 | 0.106473 | 11.75 | 0.414 | 0.10647 |
| 13.27 | 0.1529 | 0.10173 | 11.93 | 0.4064 | 0.101423 | 11.79 | 0.0132 | 0.094425 | 12.92 | 0.6449 | 0.098839 | 11.72 | 0.4681 | 0.109897 |
| 13.27 | -0.0586 | 0.099139 | 11.93 | 0.1557 | 0.09788 | 11.78 | 0.0028 | 0.102583 | 12.9 | 0.0508 | 0.098443 | 11.71 | 0.5341 | 0.106296 |
| 13.26 | 0.258 | 0.099595 | 11.92 | 0.2808 | 0.104035 | 11.77 | 0.3883 | 0.108125 | 12.9 | 0.0285 | 0.09769 | 11.71 | 0.0597 | 0.106762 |
| 13.26 | -0.1122 | 0.099068 | 11.91 | 0.3516 | 0.105988 | 11.76 | 0.2651 | 0.099177 | 12.89 | 0.0561 | 0.101562 | 11.66 | 0.2407 | 0.100228 |
| 13.26 | -0.2568 | 0.1002 | 11.91 | 0.2878 | 0.104155 | 11.75 | 0.3412 | 0.102915 | 12.89 | -0.0093 | 0.103792 | 11.64 | 0.2672 | 0.101458 |
| 13.25 | 0.0552 | 0.100649 | 11.91 | 0.0346 | 0.102778 | 11.74 | 0.1324 | 0.106168 | 12.89 | -0.1137 | 0.106275 | 11.62 | 0.8297 | 0.113808 |
| 13.24 | 0.0458 | 0.105257 | 11.9 | -0.0548 | 0.106805 | 11.74 | 0.1017 | 0.099583 | 12.88 | 0.0494 | 0.095508 | 11.62 | 0.5734 | 0.10744 |
| 13.23 | -0.376 | 0.105687 | 11.89 | 0.2895 | 0.122231 | 11.74 | 0.0807 | 0.100292 | 12.88 | 0.0207 | 0.093802 | 11.61 | 0.1491 | 0.107556 |
| 13.21 | -0.395 | 0.099122 | 11.88 | 0.5966 | 0.103477 | 11.72 | 0.4988 | 0.104831 | 12.86 | 0.2964 | 0.108291 | 11.59 | 0.1172 | 0.102934 |
| 13.2 | 0.3606 | 0.102637 | 11.88 | 0.2925 | 0.101887 | 11.72 | 0.1296 | 0.106811 | 12.86 | 0.0308 | 0.096732 | 11.58 | 0.0248 | 0.104915 |
| 13.2 | 0.1373 | 0.101028 | 11.87 | 0.616 | 0.102818 | 11.72 | 0.0329 | 0.106399 | 12.86 | 0.018 | 0.11454 | 11.57 | 0.3548 | 0.10742 |
| 13.19 | 1.015 | 0.107122 | 11.87 | 0.3349 | 0.101872 | 11.72 | 0.0025 | 0.10957 | 12.86 | -0.0014 | 0.11035 | 11.56 | 0.4443 | 0.101682 |
| 13.19 | 0.3142 | 0.098081 | 11.87 | 0.0843 | 0.100854 | 11.71 | -0.0344 | 0.100228 | 12.85 | 0.0395 | 0.096994 | 11.54 | 0.0239 | 0.098241 |
| 13.19 | 0.0001 | 0.096572 | 11.85 | 0.7465 | 0.109413 | 11.7 | 0.0616 | 0.105146 | 12.82 | -0.2357 | 0.101466 | 11.53 | 0.1785 | 0.10314 |
| 13.18 | 0.3782 | 0.098793 | 11.85 | 0.6685 | 0.099565 | 11.7 | 0.032 | 0.10751 | 12.8 | 0.3725 | 0.102827 | 11.53 | 0.1408 | 0.105831 |
| 13.18 | 0.0064 | 0.102466 | 11.85 | 0.3355 | 0.103824 | 11.69 | 0.2413 | 0.09761 | 12.8 | 0.0963 | 0.101853 | 11.5 | 0.2553 | 0.102308 |
| 13.17 | 0.3122 | 0.095737 | 11.85 | 0.106 | 0.099133 | 11.69 | 0.0172 | 0.108941 | 12.8 | 0.008 | 0.100524 | 11.49 | 0.3605 | 0.10491 |
| 13.17 | 0.0148 | 0.142861 | 11.84 | 0.8012 | 0.10188 | 11.69 | -0.047 | 0.103085 | 12.8 | -0.0053 | 0.101547 | 11.48 | 0.5563 | 0.106368 |
| 13.16 | 0.2208 | 0.104412 | 11.84 | 0.4338 | 0.10634 | 11.68 | 0.0596 | 0.099185 | 12.78 | -0.0226 | 0.108289 | 11.48 | 0.3602 | 0.100415 |
| 13.15 | 0.1664 | 0.099693 | 11.84 | 0.4226 | 0.101695 | 11.66 | 0.1196 | 0.102278 | 12.78 | -0.1084 | 0.095565 | 11.47 | 0.5903 | 0.096649 |
| 13.14 | 0.2255 | 0.104734 | 11.84 | 0.148 | 0.105937 | 11.65 | 0.2988 | 0.11015 | 12.77 | 0.7071 | 0.119199 | 11.47 | 0.3403 | 0.109542 |
| 13.14 | 0.0481 | 0.099058 | 11.84 | 0.0075 | 0.098328 | 11.65 | 0.2704 | 0.102381 | 12.77 | 0.3984 | 0.104599 | 11.46 | 0.1257 | 0.107816 |
| 13.13 | 0.1878 | 0.094974 | 11.84 | -0.0012 | 0.101126 | 11.64 | 0.0755 | 0.097265 | 12.77 | -0.0132 | 0.108032 | 11.45 | 0.1396 | 0.101812 |
| 13.13 | -0.0095 | 0.100335 | 11.83 | 0.41 | 0.103105 | 11.63 | 0.2261 | 0.103782 | 12.76 | -0.0342 | 0.100255 | 11.45 | 0.027 | 0.105472 |
| 13.12 | 0.1417 | 0.071352 | 11.83 | 0.0644 | 0.103534 | 11.62 | 0.1718 | 0.111531 | 12.76 | -0.1656 | 0.098788 | 11.44 | 0.8103 | 0.104982 |
| 13.11 | 0.2613 | 0.082847 | 11.82 | 0.344 | 0.107906 | 11.6 | 0.0732 | 0.104446 | 12.75 | 0.4949 | 0.103841 | 11.43 | 0.2488 | 0.106142 |
| 13.11 | 0.2083 | 0.099223 | 11.81 | 0.4125 | 0.104279 | 11.59 | 0.4092 | 0.10202 | 12.75 | 0.2948 | 0.101588 | 11.43 | 0.0656 | 0.103877 |
| 13.1 | 0.1378 | 0.095147 | 11.81 | 0.2549 | 0.1007 | 11.58 | 0.373 | 0.098421 | 12.75 | 0.0069 | 0.102598 | 11.42 | 0.1194 | 0.111188 |
| 13.09 | 0.0924 | 0.097398 | 11.8 | 0.6991 | 0.106188 | 11.57 | 0.0815 | 0.100859 | 12.75 | -0.0152 | 0.101851 | 11.4 | 0.5314 | 0.103382 |
| 13.09 | 0.0535 | 0.099095 | 11.8 | 0.4606 | 0.097228 | 11.57 | 0.0278 | 0.102415 | 12.74 | 0.1096 | 0.098978 | 11.4 | 0.2237 | 0.09914 |
| 13.09 | -0.0869 | 0.091398 | 11.79 | 0.0338 | 0.110198 | 11.56 | 0.0254 | 0.105094 | 12.74 | 0.0068 | 0.099588 | 11.4 | 0.0754 | 0.105292 |
| 13.09 | -0.0886 | 0.092568 | 11.78 | 0.454 | 0.108419 | 11.55 | 0.2693 | 0.097788 | 12.73 | 0.2483 | 0.100978 | 11.39 | 0.0483 | 0.107758 |
| 13.08 | -0.0168 | 0.100991 | 11.77 | 0.6273 | 0.107442 | 11.54 | 0.2279 | 0.103689 | 12.73 | -0.0124 | 0.107407 | 11.39 | 0.0205 | 0.098684 |
| 13.07 | 0.0245 | 0.100147 | 11.76 | 0.6203 | 0.100071 | 11.53 | 0.0221 | 0.088549 | 12.73 | -0.2661 | 0.095247 | 11.38 | 0.406 | 0.102056 |
| 13.06 | 0.121 | 0.101295 | 11.76 | 0.2305 | 0.098825 | 11.53 | 0.0166 | 0.10249 | 12.72 | -0.2305 | 0.096702 | 11.37 | 1.079 | 0.101687 |
| 13.06 | 0.0348 | 0.103243 | 11.76 | 0.2008 | 0.092867 | 11.52 | -0.0411 | 0.097405 | 12.71 | 0.097 | 0.094672 | 11.37 | 0.633 | 0.097113 |
| 13.05 | 0.269 | 0.099451 | 11.75 | 0.0178 | 0.093531 | 11.51 | 0.4706 | 0.099693 | 12.71 | -0.0001 | 0.10156 | 11.37 | 0.5196 | 0.108418 |
| 13.05 | 0.2638 | 0.098169 | 11.74 | 0.7686 | 0.100132 | 11.51 | 0.1227 | 0.064947 | 12.71 | -0.0026 | 0.09642 | 11.35 | 0.4208 | 0.102844 |
| 13.04 | 0.0802 | 0.100245 | 11.74 | 0.6799 | 0.100745 | 11.5 | 0.0286 | 0.107078 | 12.71 | -0.0435 | 0.099612 | 11.34 | 0.1439 | 0.103083 |
| 13.03 | -0.1653 | 0.096914 | 11.74 | 0.0397 | 0.103239 | 11.5 | -0.0083 | 0.102848 | 12.71 | -0.0797 | 0.098154 | 11.33 | -0.1195 | 0.107714 |
| 13.01 | 0.1304 | 0.098335 | 11.74 | -0.0007 | 0.104692 | 11.5 | -0.1129 | 0.103435 | 12.7 | 0.4038 | 0.100085 | 11.32 | 0.8347 | 0.099451 |
| 13 | 0.1641 | 0.104467 | 11.73 | 0.0383 | 0.09804 | 11.49 | 0.3614 | 0.100037 | 12.7 | 0.0314 | 0.103977 | 11.32 | 0.5756 | 0.101412 |
| 13 | 0.1184 | 0.103904 | 11.71 | 0.3271 | 0.102436 | 11.49 | 0.1069 | 0.102664 | 12.7 | -0.058 | 0.104946 | 11.32 | 0.4461 | 0.098346 |
| 13 | 0.0934 | 0.095566 | 11.7 | 0.4306 | 0.105995 | 11.49 | 0.0065 | 0.098437 | 12.69 | -0.0046 | 0.104044 | 11.32 | 0.0183 | 0.107578 |
| 13 | -0.024 | 0.098164 | 11.68 | 0.4589 | 0.104566 | 11.48 | 0.5124 | 0.094806 | 12.68 | -0.0559 | 0.095829 | 11.31 | 0.1281 | 0.097474 |
| 12.99 | 0.5059 | 0.103616 | 11.68 | 0.3724 | 0.099642 | 11.48 | 0.022 | 0.104435 | 12.68 | -0.1247 | 0.100595 | 11.31 | 0.1171 | 0.106632 |
| 12.99 | -0.0502 | 0.099486 | 11.66 | 0.3318 | 0.098581 | 11.47 | 0.057 | 0.111706 | 12.67 | 0.2254 | 0.106214 | 11.3 | 0.4679 | 0.104565 |
| 12.99 | -0.1865 | 0.101962 | 11.66 | 0.3053 | 0.09944 | 11.46 | 0.4565 | 0.099161 | 12.67 | 0.0402 | 0.100363 | 11.3 | 0.4604 | 0.106442 |
| 12.98 | 0.122 | 0.097252 | 11.65 | 0.6205 | 0.110335 | 11.46 | 0.029 | 0.099237 | 12.67 | -0.0078 | 0.105195 | 11.27 | 0.0452 | 0.105482 |
| 12.97 | 0.0503 | 0.094251 | 11.64 | 0.0781 | 0.105484 | 11.46 | 0.027 | 0.107838 | 12.66 | 0.044 | 0.096265 | 11.26 | 0.4351 | 0.106263 |
| 12.97 | -0.3718 | 0.110734 | 11.63 | 0.7378 | 0.10377 | 11.46 | 0.0122 | 0.100248 | 12.66 | -0.0363 | 0.104165 | 11.26 | 0.3108 | 0.104718 |
| 12.96 | 1.303 | 0.109061 | 11.63 | 0.3099 | 0.097534 | 11.46 | -0.0052 | 0.096934 | 12.66 | -0.0694 | 0.106759 | 11.26 | 0.192 | 0.110491 |
| 12.96 | 0.5238 | 0.103612 | 11.62 | 0.4598 | 0.102826 | 11.46 | -0.1284 | 0.103138 | 12.66 | -0.1148 | 0.099792 | 11.26 | 0.0097 | 0.103524 |
| 12.96 | 0.1734 | 0.099465 | 11.62 | 0.3427 | 0.094298 | 11.45 | 0.5976 | 0.105638 | 12.65 | -0.0004 | 0.097545 | 11.25 | 0.007 | 0.106611 |
| 12.96 | 0.134 | 0.107625 | 11.62 | 0.3282 | 0.105142 | 11.44 | 0.189 | 0.094666 | 12.64 | 0.0728 | 0.098105 | 11.24 | 0.0953 | 0.102656 |
| 12.96 | 0.0593 | 0.100162 | 11.62 | 0.1273 | 0.112482 | 11.44 | 0.058 | 0.091685 | 12.64 | -0.1322 | 0.105688 | 11.24 | 0.0451 | 0.10709 |
| 12.96 | -0.2503 | 0.090472 | 11.62 | 0.025 | 0.100083 | 11.44 | 0.0013 | 0.097579 | 12.62 | 0.4468 | 0.091821 | 11.23 | 0.5229 | 0.101117 |
| 12.95 | 0.1827 | 0.10204 | 11.61 | 0.678 | 0.100311 | 11.43 | 0.0173 | 0.10132 | 12.62 | 0.2077 | 0.106048 | 11.23 | 0.4232 | 0.11211 |
| 12.95 | 0.0184 | 0.102124 | 11.6 | 0.5373 | 0.096982 | 11.43 | 0.0086 | 0.102772 | 12.62 | 0.1791 | 0.101304 | 11.23 | 0.3927 | 0.104063 |
| 12.95 | -0.0931 | 0.10057 | 11.6 | 0.267 | 0.102078 | 11.42 | 0.3564 | 0.098397 | 12.62 | 0.0978 | 0.101173 | 11.23 | 0.0629 | 0.103451 |
| 12.94 | 0.1836 | 0.108627 | 11.58 | 0.5654 | 0.101754 | 11.42 | 0.0978 | 0.092318 | 12.62 | 0.0653 | 0.094066 | 11.22 | 0.5836 | 0.105648 |
| 12.94 | 0.0524 | 0.102773 | 11.58 | 0.0733 | 0.105176 | 11.41 | 0.0254 | 0.105731 | 12.62 | -0.0202 | 0.107771 | 11.22 | 0.5679 | 0.098179 |
| 12.93 | -0.0034 | 0.100562 | 11.57 | 0.5025 | 0.107981 | 11.41 | 0.0013 | 0.1076 | 12.62 | -0.0492 | 0.116758 | 11.22 | 0.0887 | 0.108998 |
| 12.93 | -0.1022 | 0.101038 | 11.57 | 0.1785 | 0.104697 | 11.39 | 0.2074 | 0.101776 | 12.6 | 0.0878 | 0.09525 | 11.21 | 0.4584 | 0.108967 |
| 12.92 | 0.443 | 0.059539 | 11.55 | 0.4754 | 0.098088 | 11.38 | 0.4362 | 0.095345 | 12.59 | -0.0098 | 0.10319 | 11.21 | 0.1259 | 0.100085 |
| 12.92 | 0.2215 | 0.105991 | 11.55 | -0.0499 | 0.098597 | 11.38 | 0.3222 | 0.102348 | 12.58 | -0.0772 | 0.100145 | 11.21 | 0.1063 | 0.102436 |
| 12.92 | -0.007 | 0.105582 | 11.54 | 0.2477 | 0.1001 | 11.38 | 0.0448 | 0.104235 | 12.57 | -0.0189 | 0.094984 | 11.21 | 0.0597 | 0.104152 |
| 12.92 | -0.0384 | 0.098019 | 11.53 | 0.5808 | 0.098281 | 11.38 | -0.0669 | 0.09774 | 12.56 | -0.0086 | 0.101014 | 11.21 | 0.041 | 0.099082 |
| 12.92 | -0.5894 | 0.094898 | 11.53 | 0.3059 | 0.107183 | 11.38 | -0.1152 | 0.104251 | 12.56 | -0.0295 | 0.081714 | 11.2 | 0.3273 | 0.109754 |
| 12.91 | -0.0624 | 0.102509 | 11.52 | 0.6751 | 0.098332 | 11.37 | -0.2872 | 0.100854 | 12.55 | 0.1536 | 0.094815 | 11.2 | 0.2608 | 0.098729 |
| 12.9 | 0.1005 | 0.096425 | 11.52 | 0.4477 | 0.097935 | 11.36 | 0.5361 | 0.098924 | 12.54 | 0.3124 | 0.098159 | 11.2 | 0.0306 | 0.104646 |
| 12.9 | 0.0743 | 0.10319 | 11.52 | 0.3842 | 0.099254 | 11.36 | -0.0613 | 0.105267 | 12.54 | 0.1968 | 0.146995 | 11.19 | 0.0498 | 0.104231 |
| 12.9 | 0.0137 | 0.100807 | 11.52 | 0.1277 | 0.103072 | 11.35 | 0.7885 | 0.098796 | 12.54 | 0.1563 | 0.097382 | 11.18 | 0.51 | 0.105471 |
| 12.89 | 0.0998 | 0.098201 | 11.52 | 0.0416 | 0.099117 | 11.35 | 0.069 | 0.11347 | 12.54 | 0.0039 | 0.100262 | 11.18 | 0.1978 | 0.102386 |
| 12.89 | 0.0981 | 0.099037 | 11.51 | 0.4432 | 0.103048 | 11.34 | 0.0478 | 0.101625 | 12.53 | -0.0158 | 0.116984 | 11.18 | 0.1668 | 0.103898 |
| 12.89 | -0.0314 | 0.101434 | 11.51 | 0.0543 | 0.100419 | 11.33 | 0.4598 | 0.103919 | 12.52 | 0.4441 | 0.106408 | 11.18 | 0.0169 | 0.103584 |
| 12.89 | -0.0674 | 0.098769 | 11.49 | 0.65 | 0.098832 | 11.33 | 0.0793 | 0.098138 | 12.52 | 0.1364 | 0.099668 | 11.17 | 0.7484 | 0.106783 |
| 12.88 | 0.1578 | 0.096408 | 11.49 | -0.0052 | 0.102455 | 11.33 | 0.054 | 0.100963 | 12.52 | -0.3518 | 0.099434 | 11.17 | 0.6036 | 0.112598 |
| 12.88 | 0.0774 | 0.105998 | 11.48 | 0.3484 | 0.097417 | 11.33 | 0.0288 | 0.100255 | 12.51 | 0.3419 | 0.100837 | 11.17 | 0.5042 | 0.107758 |
| 12.88 | -0.0415 | 0.102815 | 11.48 | -0.0262 | 0.125353 | 11.32 | 0.3754 | 0.094072 | 12.51 | 0.0233 | 0.096181 | 11.17 | 0.421 | 0.109662 |
| 12.87 | 0.2941 | 0.097569 | 11.47 | 0.06 | 0.101457 | 11.32 | 0.0555 | 0.103613 | 12.51 | -0.331 | 0.107344 | 11.17 | 0.1638 | 0.102468 |
| 12.87 | 0.1764 | 0.102702 | 11.47 | -0.0015 | 0.099189 | 11.32 | 0.0461 | 0.099841 | 12.5 | 0.1875 | 0.09308 | 11.17 | 0.0035 | 0.106483 |
| 12.87 | 0.0807 | 0.098634 | 11.45 | 0.3781 | 0.098745 | 11.32 | 0.0278 | 0.098829 | 12.5 | 0.0266 | 0.098335 | 11.17 | 0.0002 | 0.107722 |
| 12.87 | 0.0184 | 0.105263 | 11.45 | 0.1334 | 0.100308 | 11.32 | -0.0309 | 0.103118 | 12.5 | 0.0039 | 0.100332 | 11.16 | 0.0768 | 0.105371 |
| 12.86 | 0.0091 | 0.100372 | 11.44 | -0.0065 | 0.100116 | 11.32 | -0.0703 | 0.101683 | 12.5 | -0.112 | 0.100668 | 11.15 | 0.5002 | 0.105089 |
| 12.85 | 0.0167 | 0.104035 | 11.44 | -0.0149 | 0.104047 | 11.32 | -0.1616 | 0.10518 | 12.49 | 0.0686 | 0.098808 | 11.15 | 0.4794 | 0.099841 |
| 12.84 | 0.0876 | 0.105808 | 11.43 | 0.8178 | 0.108913 | 11.31 | 0.1244 | 0.100578 | 12.48 | 0.4775 | 0.108323 | 11.15 | 0.121 | 0.099188 |
| 12.84 | -0.1703 | 0.101548 | 11.43 | 0.689 | 0.101467 | 11.31 | -0.1909 | 0.101011 | 12.48 | 0.176 | 0.103093 | 11.15 | 0.0845 | 0.105125 |
| 12.84 | -0.1806 | 0.086355 | 11.43 | 0.4125 | 0.098462 | 11.3 | 0.2715 | 0.10515 | 12.48 | -0.0095 | 0.107787 | 11.15 | 0.0353 | 0.103015 |
| 12.84 | -0.9216 | 0.103765 | 11.43 | 0.4096 | 0.101538 | 11.3 | 0.0927 | 0.095431 | 12.47 | 0.0944 | 0.10345 | 11.14 | 0.5241 | 0.11266 |
| 12.83 | 0.1173 | 0.089933 | 11.43 | 0.3678 | 0.105475 | 11.3 | 0.0465 | 0.097209 | 12.47 | 0.0899 | 0.102042 | 11.14 | 0.3467 | 0.099441 |
| 12.83 | 0.1019 | 0.10321 | 11.43 | 0.3614 | 0.106182 | 11.28 | 0.0319 | 0.100158 | 12.47 | -0.0061 | 0.099937 | 11.13 | 0.39 | 0.099865 |
| 12.83 | 0.0578 | 0.104265 | 11.43 | 0.2752 | 0.098402 | 11.28 | -0.0226 | 0.098267 | 12.47 | -0.0065 | 0.099915 | 11.13 | 0.1303 | 0.111435 |
| 12.83 | -0.1188 | 0.095603 | 11.43 | 0.1499 | 0.101377 | 11.28 | -0.2031 | 0.09309 | 12.46 | 0.0766 | 0.102518 | 11.12 | 0.0895 | 0.108545 |
| 12.82 | 0.1127 | 0.146452 | 11.42 | 0.6511 | 0.101393 | 11.27 | 0.2099 | 0.114247 | 12.46 | 0.0042 | 0.106945 | 11.12 | 0.001 | 0.105972 |
| 12.82 | 0.0225 | 0.102809 | 11.41 | 0.6842 | 0.098274 | 11.27 | 0.1129 | 0.086911 | 12.45 | 0.0682 | 0.098039 | 11.11 | -0.0051 | 0.102065 |
| 12.82 | 0.002 | 0.102102 | 11.41 | 0.2997 | 0.100189 | 11.27 | 0.0528 | 0.100601 | 12.44 | -0.097 | 0.104989 | 11.1 | 0.1775 | 0.116266 |
| 12.82 | -0.2278 | 0.099302 | 11.4 | 0.5203 | 0.104141 | 11.27 | -0.3653 | 0.106342 | 12.44 | -0.2929 | 0.106677 | 11.1 | 0.0384 | 0.109979 |
| 12.81 | 0.3402 | 0.096963 | 11.39 | 0.2939 | 0.102652 | 11.26 | 0.3656 | 0.103818 | 12.42 | -0.1214 | 0.105299 | 11.1 | 0.0289 | 0.104993 |
| 12.81 | 0.0872 | 0.100346 | 11.39 | 0.0009 | 0.099739 | 11.26 | 0.0646 | 0.107628 | 12.42 | -0.1833 | 0.105915 | 11.09 | 0.207 | 0.101336 |
| 12.81 | 0.0742 | 0.102102 | 11.39 | -0.0059 | 0.102885 | 11.26 | 0.0343 | 0.095159 | 12.41 | 0.2285 | 0.073286 | 11.08 | 0.5235 | 0.101183 |
| 12.81 | -0.0732 | 0.107088 | 11.39 | -0.0909 | 0.110636 | 11.25 | 0.0977 | 0.091095 | 12.41 | 0.0769 | 0.103759 | 11.08 | 0.0815 | 0.109642 |
| 12.8 | 0.1666 | 0.099287 | 11.38 | 0.0573 | 0.099072 | 11.25 | 0.0898 | 0.094225 | 12.4 | -0.0331 | 0.106772 | 11.07 | 0.4606 | 0.107021 |
| 12.8 | 0.132 | 0.093406 | 11.38 | 0.0165 | 0.101043 | 11.25 | 0.0862 | 0.104787 | 12.38 | -0.225 | 0.116232 | 11.06 | 0.1328 | 0.10434 |
| 12.8 | 0.1215 | 0.101412 | 11.37 | 0.734 | 0.104342 | 11.24 | 0.4836 | 0.099353 | 12.37 | 0.1214 | 0.101802 | 11.06 | 0.0228 | 0.111318 |
| 12.8 | 0.0178 | 0.100357 | 11.37 | 0.4386 | 0.108864 | 11.24 | 0.2338 | 0.106622 | 12.37 | 0.0721 | 0.115401 | 11.05 | 0.5166 | 0.101602 |
| 12.8 | -0.4622 | 0.101821 | 11.37 | 0.1394 | 0.100336 | 11.24 | 0.0587 | 0.100338 | 12.37 | -0.1833 | 0.094545 | 11.05 | 0.3817 | 0.104412 |
| 12.79 | 0.2012 | 0.146385 | 11.36 | 0.5636 | 0.101963 | 11.23 | 0.1756 | 0.095262 | 12.37 | -0.4586 | 0.092619 | 11.04 | 0.4564 | 0.10236 |
| 12.79 | 0.100905865 | 0.108259 | 11.36 | 0.4483 | 0.101025 | 11.23 | 0.0754 | 0.102019 | 12.35 | 0.3856 | 0.105174 | 11.04 | 0.1186 | 0.100368 |
| 12.79 | -0.0065 | 0.098497 | 11.35 | 0.8353 | 0.103746 | 11.21 | 0.1841 | 0.101904 | 12.35 | 0.0797 | 0.104257 | 11.04 | 0.0022 | 0.108904 |
| 12.79 | -0.057 | 0.098067 | 11.34 | 0.2977 | 0.105986 | 11.21 | 0.1769 | 0.099868 | 12.35 | 0.0532 | 0.097165 | 11.03 | 0.091 | 0.100978 |
| 12.78 | 0.3308 | 0.104451 | 11.32 | 0.4291 | 0.103465 | 11.21 | 0.1049 | 0.094008 | 12.35 | -0.0649 | 0.099509 | 11.03 | 0.0145 | 0.106995 |
| 12.78 | 0.06 | 0.092675 | 11.32 | -0.0256 | 0.109356 | 11.21 | 0.0115 | 0.097651 | 12.34 | -0.2366 | 0.107232 | 11.02 | 0.3421 | 0.106635 |
| 12.78 | 0.0461 | 0.101465 | 11.31 | 0.3403 | 0.109595 | 11.21 | -0.0098 | 0.100605 | 12.33 | 0.0854 | 0.103712 | 11.02 | 0.293 | 0.110908 |
| 12.78 | -0.0162 | 0.103598 | 11.29 | 0.3438 | 0.101518 | 11.19 | 0.5789 | 0.107386 | 12.33 | 0.049 | 0.094715 | 11.01 | 0.411 | 0.107565 |
| 12.78 | -0.4608 | 0.106106 | 11.28 | -0.0531 | 0.099893 | 11.19 | 0.1364 | 0.113998 | 12.33 | 0.029 | 0.101984 | 11.01 | 0.0666 | 0.101938 |
| 12.76 | 0.0796 | 0.103245 | 11.26 | -0.0499 | 0.093833 | 11.19 | -0.6322 | 0.093155 | 12.33 | -0.0297 | 0.106117 | 11 | 0.0106 | 0.108698 |
| 12.76 | 0.0778 | 0.101007 | 11.25 | 0.1708 | 0.097914 | 11.18 | 0.5397 | 0.114375 | 12.33 | -0.0391 | 0.108745 | 11 | -0.0025 | 0.108113 |
| 12.76 | -0.0438 | 0.098831 | 11.24 | -0.2713 | 0.109629 | 11.15 | 0.4402 | 0.099938 | 12.32 | 0.2196 | 0.097513 | 10.99 | 0.5134 | 0.106272 |
| 12.76 | -0.0539 | 0.104845 | 11.23 | 0.7704 | 0.097546 | 11.15 | 0.4095 | 0.10076 | 12.32 | 0.0772 | 0.104008 | 10.99 | 0.124 | 0.104559 |
| 12.76 | -0.1819 | 0.09908 | 11.21 | 0.3102 | 0.098194 | 11.15 | 0.261 | 0.099958 | 12.32 | 0.0606 | 0.101744 | 10.99 | 0.0568 | 0.104808 |
| 12.75 | 0.1604 | 0.144274 | 11.21 | 0.1893 | 0.095173 | 11.15 | 0.0523 | 0.100682 | 12.32 | 0.0481 | 0.101727 | 10.96 | 0.4462 | 0.103398 |
| 12.75 | 0.1465 | 0.106865 | 11.21 | -0.0586 | 0.098687 | 11.14 | 0.0576 | 0.115556 | 12.32 | -0.1998 | 0.102254 | 10.95 | 0.0238 | 0.107165 |
| 12.75 | 0.0987 | 0.099001 | 11.18 | 0.4292 | 0.102618 | 11.13 | 0.0042 | 0.099484 | 12.31 | 0.1454 | 0.105162 | 10.94 | 0.5798 | 0.097526 |
| 12.75 | 0.0417 | 0.099136 | 11.17 | -0.0123 | 0.102915 | 11.12 | 0.2485 | 0.102757 | 12.29 | -0.0217 | 0.104214 | 10.94 | 0.1181 | 0.107375 |
| 12.74 | -0.0007 | 0.099911 | 11.14 | 0.115 | 0.10615 | 11.12 | 0.0174 | 0.096329 | 12.29 | -0.1144 | 0.100457 | 10.94 | 0.0483 | 0.110961 |
| 12.74 | -0.0049 | 0.104522 | 11.12 | 0.3558 | 0.108335 | 11.11 | 0.1084 | 0.099115 | 12.29 | -0.1422 | 0.100892 | 10.93 | 0.4692 | 0.111848 |
| 12.73 | 0.0962 | 0.101309 | 11.11 | -0.0252 | 0.100128 | 11.1 | 0.1986 | 0.101166 | 12.29 | -0.1806 | 0.107694 | 10.92 | 0.2705 | 0.112515 |
| 12.73 | -0.0776 | 0.09845 | 11.1 | 0.0226 | 0.093793 | 11.1 | -0.1127 | 0.101818 | 12.28 | 0.3868 | 0.100505 | 10.92 | 0.1128 | 0.108303 |
| 12.73 | -0.1266 | 0.100305 | 11.1 | -0.0451 | 0.105441 | 11.09 | 0.2146 | 0.108025 | 12.28 | 0.0537 | 0.105598 | 10.91 | 0.3129 | 0.100956 |
| 12.72 | 0.3958 | 0.098503 | 11.09 | 0.0338 | 0.111548 | 11.09 | 0.2054 | 0.107236 | 12.28 | -0.0054 | 0.099118 | 10.9 | 0.518 | 0.096711 |
| 12.72 | -0.0019 | 0.100785 | 11.08 | 0.7966 | 0.099038 | 11.09 | -0.0578 | 0.105791 | 12.28 | -0.0358 | 0.099239 | 10.9 | 0.091 | 0.099293 |
| 12.71 | 0.2269 | 0.104888 | 11.06 | 0.4057 | 0.101548 | 11.08 | 0.2041 | 0.100377 | 12.27 | -0.0651 | 0.10154 | 10.9 | 0.0245 | 0.102758 |
| 12.71 | 0.159 | 0.101492 | 11.06 | 0.3539 | 0.098406 | 11.07 | 0.2117 | 0.104037 | 12.26 | 0.018 | 0.110626 | 10.9 | -0.0124 | 0.099107 |
| 12.71 | 0.139 | 0.093637 | 11.06 | 0.0067 | 0.105261 | 11.07 | 0.0608 | 0.084457 | 12.25 | 0.0222 | 0.109732 | 10.89 | -0.044 | 0.101727 |
| 12.7 | 0.714 | 0.105143 | 11.06 | 0.0059 | 0.102362 | 11.06 | 0.2858 | 0.104123 | 12.25 | -0.2329 | 0.104128 | 10.88 | 0.4391 | 0.104031 |
| 12.7 | 0.0433 | 0.096814 | 11.06 | -0.0408 | 0.098934 | 11.06 | 0.0907 | 0.107995 | 12.25 | -0.3089 | 0.096785 | 10.88 | 0.3749 | 0.097767 |
| 12.7 | -0.0094 | 0.107255 | 11.03 | -0.0013 | 0.104029 | 11.06 | 0.039 | 0.099563 | 12.24 | 0.0777 | 0.103687 | 10.88 | 0.1341 | 0.107005 |
| 12.69 | 0.0921 | 0.095685 | 11.02 | 0.0932 | 0.104924 | 11.05 | -0.1803 | 0.103212 | 12.24 | 0.0122 | 0.106806 | 10.88 | 0.0542 | 0.108807 |
| 12.68 | 0.364 | 0.099422 | 11.02 | 0.0845 | 0.102112 | 11.03 | 0.4859 | 0.120151 | 12.23 | 0.1014 | 0.097426 | 10.88 | 0.0345 | 0.109121 |
| 12.68 | 0.2123 | 0.101877 | 11.02 | 0.0137 | 0.103003 | 11.03 | 0.3306 | 0.102002 | 12.23 | 0.0203 | 0.10119 | 10.87 | 0.0232 | 0.101641 |
| 12.68 | 0.0143 | 0.103135 | 11 | -0.0603 | 0.09973 | 11.03 | -0.5257 | 0.099273 | 12.23 | 0.0126 | 0.099095 | 10.86 | 0.234 | 0.104487 |
| 12.68 | -0.009 | 0.10449 | 10.99 | 0.3138 | 0.109538 | 11.02 | 0.1866 | 0.105316 | 12.23 | -0.412 | 0.097181 | 10.86 | 0.0322 | 0.112499 |
| 12.67 | 0.3379 | 0.099712 | 10.98 | 0.2046 | 0.104372 | 11.02 | 0.0502 | 0.100905 | 12.22 | 0.2771 | 0.107825 | 10.86 | 0.0302 | 0.104156 |
| 12.67 | 0.1378 | 0.102993 | 10.98 | -0.0438 | 0.107627 | 11.01 | -0.3006 | 0.105578 | 12.22 | 0.118 | 0.103113 | 10.85 | 0.0591 | 0.103781 |
| 12.66 | -0.001 | 0.100942 | 10.97 | 0.5224 | 0.102192 | 11 | 0.0669 | 0.10038 | 12.22 | 0.037 | 0.098775 | 10.85 | 0.0551 | 0.109397 |
| 12.65 | 0.0283 | 0.101882 | 10.97 | 0.3709 | 0.110858 | 10.99 | 0.0455 | 0.102592 | 12.22 | -0.0034 | 0.100892 | 10.85 | 0.0022 | 0.108412 |
| 12.65 | -0.4264 | 0.102502 | 10.97 | 0.0158 | 0.101598 | 10.99 | 0.0246 | 0.108468 | 12.2 | 0.0029 | 0.093092 | 10.84 | 0.514 | 0.118516 |
| 12.64 | 0.3082 | 0.105855 | 10.97 | 0.0033 | 0.104753 | 10.99 | -0.0082 | 0.105371 | 12.19 | 0.0231 | 0.100151 | 10.84 | 0.3548 | 0.103759 |
| 12.64 | 0.2663 | 0.097674 | 10.97 | -0.2225 | 0.106672 | 10.98 | 0.3313 | 0.100098 | 12.19 | 0.0122 | 0.102221 | 10.84 | 0.2357 | 0.102492 |
| 12.64 | -0.0164 | 0.096323 | 10.96 | -0.0046 | 0.11557 | 10.98 | 0.0034 | 0.098309 | 12.19 | 0.0013 | 0.113157 | 10.84 | 0.0698 | 0.112589 |
| 12.64 | -0.0246 | 0.102989 | 10.94 | 0.0182 | 0.097369 | 10.98 | -0.0368 | 0.097005 | 12.17 | 0.2404 | 0.0993 | 10.83 | 0.4489 | 0.111531 |
| 12.64 | -0.1619 | 0.145874 | 10.93 | -0.0641 | 0.100479 | 10.97 | 0.1479 | 0.103571 | 12.17 | 0.0859 | 0.103026 | 10.83 | 0.1073 | 0.107656 |
| 12.63 | 0.2571 | 0.098744 | 10.91 | 0.4688 | 0.099823 | 10.97 | 0.0203 | 0.10972 | 12.17 | 0.0341 | 0.098385 | 10.83 | 0.0845 | 0.112517 |
| 12.63 | 0.2157 | 0.104142 | 10.91 | 0.0334 | 0.096155 | 10.96 | -0.0029 | 0.108303 | 12.17 | 0.0067 | 0.099501 | 10.82 | 0.4627 | 0.105529 |
| 12.63 | 0.1272 | 0.145863 | 10.91 | -0.0402 | 0.101004 | 10.96 | -0.0451 | 0.100575 | 12.17 | -0.0279 | 0.099138 | 10.82 | 0.0582 | 0.107568 |
| 12.63 | 0.0298 | 0.104053 | 10.9 | 0.0008 | 0.098562 | 10.95 | 0.8369 | 0.102492 | 12.16 | -0.0073 | 0.106554 | 10.81 | 0.1275 | 0.107086 |
| 12.63 | -0.0721 | 0.108913 | 10.87 | 0.8085 | 0.10877 | 10.95 | 0.4353 | 0.102304 | 12.16 | -0.008 | 0.090393 | 10.81 | 0.0699 | 0.103086 |
| 12.62 | 0.1992 | 0.104582 | 10.85 | 1.117 | 0.102756 | 10.95 | 0.0347 | 0.094936 | 12.16 | -0.015 | 0.107686 | 10.81 | 0.047 | 0.108071 |
| 12.62 | -0.2264 | 0.099719 | 10.85 | 0.0381 | 0.101777 | 10.95 | 0.0157 | 0.093916 | 12.16 | -0.045 | 0.097348 | 10.81 | 0.0454 | 0.103795 |
| 12.61 | 0.0067 | 0.105657 | 10.84 | 0.0488 | 0.106798 | 10.95 | 0.0021 | 0.113609 | 12.16 | -0.4879 | 0.108276 | 10.8 | 0.4643 | 0.098872 |
| 12.61 | -0.0321 | 0.097323 | 10.83 | 0.4045 | 0.116166 | 10.95 | -0.0128 | 0.101372 | 12.15 | 0.0909 | 0.109988 | 10.8 | 0.0806 | 0.096803 |
| 12.6 | 0.2083 | 0.102298 | 10.82 | 0.0228 | 0.1013 | 10.95 | -0.0325 | 0.100444 | 12.15 | 0.0474 | 0.108998 | 10.79 | 0.0524 | 0.105632 |
| 12.6 | 0.1072 | 0.094795 | 10.81 | 0.4156 | 0.09717 | 10.94 | -0.0002 | 0.107112 | 12.14 | 0.134 | 0.09763 | 10.79 | 0.0456 | 0.1082 |
| 12.6 | 0.0746 | 0.09728 | 10.81 | 0.0013 | 0.104672 | 10.94 | -0.054 | 0.097263 | 12.14 | 0.0489 | 0.093749 | 10.79 | 0.0189 | 0.10192 |
| 12.6 | -0.3293 | 0.115665 | 10.8 | 0.4066 | 0.098716 | 10.93 | 0.2574 | 0.09319 | 12.13 | 0.0734 | 0.110624 | 10.79 | 0.0063 | 0.105731 |
| 12.59 | 0.1257 | 0.107342 | 10.79 | -0.0181 | 0.09909 | 10.93 | 0.0542 | 0.109512 | 12.13 | -0.0079 | 0.10294 | 10.78 | 0.3537 | 0.104657 |
| 12.59 | 0.0633 | 0.099752 | 10.78 | 0.3166 | 0.107598 | 10.92 | 0.3446 | 0.100985 | 12.12 | 0.0846 | 0.106176 | 10.78 | 0.281 | 0.100828 |
| 12.59 | -0.3053 | 0.098476 | 10.77 | 0.7565 | 0.099624 | 10.91 | 0.4078 | 0.099392 | 12.12 | -0.289 | 0.097047 | 10.77 | 0.0751 | 0.10634 |
| 12.58 | 0.0995 | 0.102712 | 10.76 | 0.4922 | 0.099507 | 10.91 | 0.1106 | 0.102908 | 12.11 | 0.1398 | 0.103752 | 10.76 | 0.5177 | 0.102469 |
| 12.58 | 0.0579 | 0.105603 | 10.74 | -0.0092 | 0.102141 | 10.91 | -0.0056 | 0.10314 | 12.11 | 0.0008 | 0.113617 | 10.76 | 0.3246 | 0.107931 |
| 12.58 | 0.0496 | 0.097378 | 10.73 | 0.1362 | 0.105053 | 10.9 | 0.116 | 0.102219 | 12.11 | -0.126 | 0.120859 | 10.76 | 0.1327 | 0.109158 |
| 12.57 | 0.2454 | 0.10517 | 10.73 | 0.0992 | 0.101054 | 10.88 | 0.2575 | 0.095268 | 12.11 | -0.2005 | 0.11423 | 10.76 | 0.1126 | 0.113442 |
| 12.57 | 0.1459 | 0.100542 | 10.73 | 0.0083 | 0.103684 | 10.87 | 0.071 | 0.100548 | 12.1 | 0.0907 | 0.095765 | 10.76 | 0.0459 | 0.105418 |
| 12.57 | 0.099 | 0.100201 | 10.71 | -0.0096 | 0.103242 | 10.86 | 0.0001 | 0.101266 | 12.1 | 0.0324 | 0.109935 | 10.76 | 0.0276 | 0.106015 |
| 12.56 | 0.0855 | 0.099405 | 10.71 | -0.1041 | 0.107487 | 10.86 | -0.0183 | 0.100265 | 12.09 | 0.1911 | 0.114367 | 10.76 | 0.0128 | 0.101706 |
| 12.56 | 0.0267 | 0.101182 | 10.67 | 0.3097 | 0.103112 | 10.85 | 0.4062 | 0.099073 | 12.09 | -0.0326 | 0.112247 | 10.75 | 0.2013 | 0.10094 |
| 12.56 | 0.0154 | 0.08798 | 10.67 | -0.0366 | 0.109082 | 10.85 | -0.0254 | 0.105688 | 12.09 | -0.1215 | 0.109078 | 10.75 | 0.0683 | 0.105681 |
| 12.55 | 0.0184 | 0.099092 | 10.66 | 0.8232 | 0.113511 | 10.84 | 0.0923 | 0.100564 | 12.09 | -0.5897 | 0.109064 | 10.73 | 0.2912 | 0.104558 |
| 12.55 | -0.0051 | 0.100038 | 10.63 | 0.6818 | 0.102919 | 10.83 | 0.0078 | 0.099008 | 12.08 | 0.0477 | 0.095932 | 10.73 | 0.0603 | 0.103931 |
| 12.55 | -0.0189 | 0.102129 | 10.63 | 0.0024 | 0.104337 | 10.82 | 0.0487 | 0.11174 | 12.08 | 0.0374 | 0.10395 | 10.73 | 0.0358 | 0.117384 |
| 12.54 | 0.0004 | 0.099278 | 10.63 | -0.0143 | 0.109434 | 10.82 | 0.0405 | 0.100055 | 12.08 | 0.0054 | 0.108318 | 10.73 | 0.0185 | 0.10339 |
| 12.53 | 0.0556 | 0.103589 | 10.63 | -0.0435 | 0.099598 | 10.82 | 0.0102 | 0.098025 | 12.08 | -0.2584 | 0.103215 | 10.72 | 0.259 | 0.107282 |
| 12.53 | 0.0407 | 0.105594 | 10.62 | 0.7694 | 0.112651 | 10.82 | -0.0626 | 0.09541 | 12.07 | 0.1039 | 0.099592 | 10.72 | 0.0242 | 0.103448 |
| 12.53 | 0.0041 | 0.100552 | 10.62 | -0.0467 | 0.100282 | 10.81 | 0.1069 | 0.099008 | 12.07 | 0.0263 | 0.097486 | 10.71 | 0.5558 | 0.108865 |
| 12.53 | -0.0107 | 0.100386 | 10.61 | 0.647 | 0.108455 | 10.81 | 0.0895 | 0.102199 | 12.06 | -0.325 | 0.105547 | 10.71 | 0.539 | 0.101497 |
| 12.52 | 0.162 | 0.09547 | 10.61 | 0.3151 | 0.09643 | 10.81 | -0.0887 | 0.100465 | 12.05 | 0.3992 | 0.107855 | 10.71 | 0.1238 | 0.101764 |
| 12.52 | 0.1127 | 0.097277 | 10.61 | 0.2827 | 0.095907 | 10.78 | 0.1649 | 0.103579 | 12.05 | 0.0411 | 0.109887 | 10.71 | 0.0562 | 0.098286 |
| 12.52 | 0.1043 | 0.092575 | 10.61 | 0.0069 | 0.102415 | 10.76 | 0.4789 | 0.096745 | 12.05 | 0.0213 | 0.104272 | 10.71 | 0.0419 | 0.108668 |
| 12.52 | 0.0503 | 0.099953 | 10.6 | 0.6666 | 0.104248 | 10.75 | 0.2371 | 0.100445 | 12.05 | 0.0132 | 0.098067 | 10.7 | 0.067 | 0.107208 |
| 12.52 | 0.039 | 0.100295 | 10.58 | 0.7817 | 0.103032 | 10.75 | 0.0383 | 0.094417 | 12.05 | -0.4448 | 0.101561 | 10.7 | 0.0059 | 0.101994 |
| 12.52 | -0.0242 | 0.098751 | 10.53 | 0.4707 | 0.099361 | 10.75 | -0.0385 | 0.105853 | 12.04 | 0.0144 | 0.113238 | 10.69 | 0.3619 | 0.102429 |
| 12.52 | -0.0468 | 0.097963 | 10.53 | 0.3303 | 0.108291 | 10.74 | 0.376 | 0.095762 | 12.04 | 0.0001 | 0.104629 | 10.69 | 0.3094 | 0.105092 |
| 12.52 | -0.3525 | 0.097452 | 10.53 | -0.045 | 0.097054 | 10.74 | 0.174749544 | 0.099388 | 12.03 | -0.0033 | 0.105866 | 10.69 | 0.0788 | 0.098392 |
| 12.51 | 0.2373 | 0.105312 | 10.52 | 0.0045 | 0.106557 | 10.74 | 0.0852 | 0.099738 | 12.03 | -0.0116 | 0.09913 | 10.69 | 0.0754 | 0.110085 |
| 12.51 | 0.1324 | 0.095296 | 10.51 | 0.0039 | 0.099564 | 10.74 | 0.0159 | 0.100054 | 12.02 | 0.1457 | 0.117582 | 10.69 | 0.026 | 0.105853 |
| 12.51 | 0.0175 | 0.099514 | 10.47 | 0.0016 | 0.102138 | 10.74 | -0.0068 | 0.105209 | 12.02 | 0.1171 | 0.101957 | 10.68 | 0.0672 | 0.100822 |
| 12.51 | 0.0006 | 0.098878 | 10.44 | -0.002 | 0.104193 | 10.72 | 0.3675 | 0.105231 | 12.02 | 0.0532 | 0.112198 | 10.68 | 0.0556 | 0.102436 |
| 12.5 | -0.0336 | 0.09491 | 10.43 | 0.045 | 0.104619 | 10.72 | 0.1116 | 0.100352 | 12.02 | -0.0126 | 0.09902 | 10.68 | 0.0413 | 0.11131 |
| 12.5 | -0.3511 | 0.103322 | 10.42 | -0.0137 | 0.102774 | 10.72 | 0.0634 | 0.098295 | 12.02 | -0.6938 | 0.10654 | 10.67 | 0.5033 | 0.106138 |
| 12.49 | 0.5356 | 0.093468 | 10.35 | 0.3664 | 0.103059 | 10.71 | -0.3298 | 0.103949 | 12.01 | -0.0175 | 0.102158 | 10.67 | 0.1196 | 0.102635 |
| 12.49 | 0.1017 | 0.098146 | 10.29 | 0.4018 | 0.100945 | 10.7 | 0.4374 | 0.104915 | 12.01 | -0.0395 | 0.106158 | 10.67 | 0.1176 | 0.102432 |
| 12.49 | -0.2376 | 0.107995 | 10.29 | -0.0186 | 0.099452 | 10.7 | 0.1463 | 0.106106 | 12.01 | -0.0654 | 0.101865 | 10.67 | 0.0501 | 0.103351 |
| 12.48 | 0.116 | 0.102952 | 10.24 | -0.0339 | 0.098132 | 10.69 | 0.4843 | 0.102914 | 12.01 | -0.0873 | 0.10392 | 10.66 | 0.4299 | 0.100159 |
| 12.48 | 0.0762 | 0.09903 | 10.18 | 0.5044 | 0.105565 | 10.69 | -0.4917 | 0.104239 | 12.01 | -0.478 | 0.104816 | 10.66 | 0.0886 | 0.104757 |
| 12.48 | 0.0209 | 0.098786 | 10.17 | 0.0088 | 0.103308 | 10.68 | 0.3341 | 0.109122 | 12 | 0.0741 | 0.103868 | 10.66 | 0.0519 | 0.105432 |
| 12.48 | 0.0143 | 0.100471 | 10.17 | -0.0799 | 0.095923 | 10.66 | 0.0109 | 0.105912 | 12 | 0.0455 | 0.105207 | 10.66 | 0.0333 | 0.099951 |
| 12.48 | 0.005 | 0.100752 | 9.98 | 0.4227 | 0.099892 | 10.64 | -0.0471 | 0.100442 | 12 | 0.0292 | 0.094055 | 10.65 | 0.3028 | 0.106768 |
| 12.48 | -0.0004 | 0.111857 | 9.65 | 0.4297 | 0.100437 | 10.63 | 0.5031 | 0.106158 | 12 | 0.0191 | 0.098022 | 10.65 | 0.1743 | 0.106022 |
| 12.48 | -0.0067 | 0.099305 | 9.6 | 0.0173 | 0.095641 | 10.61 | 0.0286 | 0.096928 | 12 | -0.0033 | 0.103677 | 10.65 | 0.1208 | 0.110545 |
| 12.48 | -0.0142 | 0.102499 | 9.38 | 0.0037 | 0.096477 | 10.61 | -0.0342 | 0.098202 | 12 | -0.0047 | 0.098628 | 10.65 | 0.0338 | 0.110218 |
| 12.48 | -0.4315 | 0.087218 |  |  |  | 10.6 | -0.0299 | 0.092691 | 11.99 | 0.0252 | 0.111269 | 10.65 | 0.0329 | 0.105045 |
| 12.47 | 0.3238 | 0.094125 |  |  |  | 10.58 | 0.1257 | 0.105999 | 11.99 | -0.1505 | 0.105978 | 10.65 | 0.0151 | 0.103848 |
| 12.47 | 0.0339 | 0.103354 |  |  |  | 10.58 | 0.1019 | 0.100802 | 11.98 | 0.2432 | 0.100838 | 10.64 | 0.8233 | 0.105152 |
| 12.47 | 0.0261 | 0.096727 |  |  |  | 10.58 | -0.4563 | 0.091322 | 11.98 | 0.114 | 0.110658 | 10.64 | 0.0064 | 0.104368 |
| 12.47 | 0.007 | 0.101159 |  |  |  | 10.57 | 0.0484 | 0.095644 | 11.97 | 0.1907 | 0.103604 | 10.64 | 0.0063 | 0.103294 |
| 12.47 | 0.005 | 0.098898 |  |  |  | 10.57 | 0.0103 | 0.106035 | 11.97 | 0.1651 | 0.096562 | 10.63 | 0.4104 | 0.099661 |
| 12.47 | -0.0423 | 0.098763 |  |  |  | 10.56 | -0.0467 | 0.109389 | 11.97 | 0.0085 | 0.102445 | 10.63 | 0.0559 | 0.110832 |
| 12.46 | 0.2288 | 0.096748 |  |  |  | 10.55 | 0.0024 | 0.100588 | 11.96 | 0.1724 | 0.105953 | 10.63 | 0.0504 | 0.107488 |
| 12.46 | 0.0603 | 0.099483 |  |  |  | 10.55 | -0.0378 | 0.105615 | 11.96 | 0.1244 | 0.107588 | 10.63 | 0.0381 | 0.107123 |
| 12.46 | 0.0167 | 0.105252 |  |  |  | 10.54 | 0.2893 | 0.097198 | 11.96 | 0.0159 | 0.105331 | 10.63 | 0.035 | 0.105446 |
| 12.46 | -0.0194 | 0.102208 |  |  |  | 10.54 | 0.1288 | 0.103841 | 11.96 | 0.0036 | 0.103075 | 10.63 | 0.0316 | 0.097655 |
| 12.45 | 0.3098 | 0.095615 |  |  |  | 10.54 | -0.0274 | 0.114222 | 11.96 | -0.1488 | 0.100693 | 10.63 | -0.005 | 0.106045 |
| 12.45 | 0.0708 | 0.106448 |  |  |  | 10.53 | 0.0819 | 0.096801 | 11.96 | -0.2355 | 0.107552 | 10.62 | 0.4243 | 0.099208 |
| 12.44 | 0.2066 | 0.107857 |  |  |  | 10.53 | 0.0037 | 0.106104 | 11.95 | 0.093 | 0.11006 | 10.62 | 0.1027 | 0.104642 |
| 12.44 | 0.1329 | 0.103325 |  |  |  | 10.52 | 0.1229 | 0.096713 | 11.95 | -0.1858 | 0.102587 | 10.62 | 0.0614 | 0.099264 |
| 12.44 | 0.1074 | 0.101354 |  |  |  | 10.51 | 0.0085 | 0.102632 | 11.94 | 0.2991 | 0.099228 | 10.62 | 0.0236 | 0.102848 |
| 12.44 | 0.0118 | 0.101625 |  |  |  | 10.51 | -0.0105 | 0.100773 | 11.94 | 0.0009 | 0.098488 | 10.62 | 0.0223 | 0.105714 |
| 12.44 | -0.0273 | 0.099798 |  |  |  | 10.51 | -0.0874 | 0.106113 | 11.94 | -0.1396 | 0.099365 | 10.62 | 0.02 | 0.097934 |
| 12.44 | -0.0321 | 0.102515 |  |  |  | 10.5 | -0.637 | 0.098046 | 11.94 | -0.3702 | 0.106823 | 10.62 | 0.0132 | 0.098603 |
| 12.44 | -0.1335 | 0.101704 |  |  |  | 10.49 | 0.0392 | 0.102939 | 11.93 | -0.1259 | 0.108643 | 10.61 | 0.5238 | 0.101581 |
| 12.44 | -0.3451 | 0.105031 |  |  |  | 10.49 | -0.5932 | 0.094899 | 11.92 | 0.2669 | 0.100218 | 10.61 | 0.1613 | 0.101508 |
| 12.43 | 0.3303 | 0.098787 |  |  |  | 10.47 | 0.1498 | 0.102042 | 11.92 | 0.0713 | 0.096263 | 10.61 | 0.0312 | 0.109573 |
| 12.43 | 0.0223 | 0.099738 |  |  |  | 10.47 | 0.0636 | 0.103463 | 11.92 | 0.0549 | 0.102601 | 10.59 | 0.0871 | 0.105171 |
| 12.43 | -0.3171 | 0.098758 |  |  |  | 10.47 | -0.1175 | 0.105925 | 11.9 | 0.0489 | 0.104442 | 10.58 | 0.2516 | 0.102875 |
| 12.42 | 0.0221 | 0.096018 |  |  |  | 10.46 | 0.3696 | 0.096798 | 11.9 | 0.0081 | 0.096868 | 10.58 | 0.0503 | 0.114815 |
| 12.41 | 0.4061 | 0.111377 |  |  |  | 10.46 | 0.2871 | 0.099109 | 11.9 | -0.0014 | 0.094668 | 10.58 | 0.0367 | 0.098238 |
| 12.41 | 0.2868 | 0.100232 |  |  |  | 10.46 | 0.0177 | 0.102568 | 11.9 | -0.1676 | 0.099085 | 10.58 | 0.0089 | 0.102039 |
| 12.41 | 0.1603 | 0.095642 |  |  |  | 10.46 | -0.0779 | 0.111819 | 11.89 | 0.0909 | 0.110962 | 10.57 | 0.0928 | 0.107798 |
| 12.41 | 0.133 | 0.101982 |  |  |  | 10.45 | 0.0282 | 0.102018 | 11.89 | -0.0158 | 0.103464 | 10.57 | 0.0127 | 0.112584 |
| 12.41 | 0.0947 | 0.102402 |  |  |  | 10.45 | -0.0182 | 0.104157 | 11.88 | 0.5042 | 0.099755 | 10.57 | -0.0054 | 0.098618 |
| 12.41 | -0.043928984 | 0.102445 |  |  |  | 10.44 | -0.1102 | 0.106824 | 11.88 | -0.0056 | 0.112418 | 10.55 | 0.4836 | 0.106329 |
| 12.41 | -0.0564 | 0.10848 |  |  |  | 10.41 | 0.1296 | 0.102175 | 11.88 | -0.0061 | 0.102872 | 10.55 | 0.3317 | 0.097531 |
| 12.41 | -0.385 | 0.107712 |  |  |  | 10.41 | 0.0567 | 0.106867 | 11.88 | -0.2371 | 0.093019 | 10.55 | 0.017 | 0.105355 |
| 12.4 | 0.4149 | 0.107968 |  |  |  | 10.4 | 0.0391 | 0.094979 | 11.86 | 0.2565 | 0.096062 | 10.55 | -0.0027 | 0.109833 |
| 12.4 | 0.0724 | 0.099268 |  |  |  | 10.38 | 0.0269 | 0.095683 | 11.86 | 0.1038 | 0.096702 | 10.54 | 0.0982 | 0.108307 |
| 12.4 | 0.0449 | 0.097696 |  |  |  | 10.37 | 0.1403 | 0.105746 | 11.86 | -0.0035 | 0.095863 | 10.54 | 0.0965 | 0.110469 |
| 12.39 | 0.411 | 0.100845 |  |  |  | 10.36 | 0.2536 | 0.106026 | 11.86 | -0.024 | 0.106586 | 10.54 | 0.0304 | 0.106044 |
| 12.39 | 0.2074 | 0.103227 |  |  |  | 10.36 | 0.103 | 0.104993 | 11.86 | -0.0801 | 0.107285 | 10.53 | 0.4535 | 0.104764 |
| 12.39 | 0.1962 | 0.097941 |  |  |  | 10.36 | 0.0574 | 0.097195 | 11.86 | -0.3042 | 0.102905 | 10.53 | 0.0953 | 0.107365 |
| 12.39 | 0.036 | 0.100768 |  |  |  | 10.36 | -0.0392 | 0.106259 | 11.85 | -0.4937 | 0.097837 | 10.53 | 0.0488 | 0.107612 |
| 12.39 | -0.0071 | 0.102904 |  |  |  | 10.35 | -0.3158 | 0.104542 | 11.85 | -0.5576 | 0.108983 | 10.53 | 0.0341 | 0.10591 |
| 12.39 | -0.0272 | 0.139741 |  |  |  | 10.34 | 0.1302 | 0.09536 | 11.84 | 0.1825 | 0.10513 | 10.52 | 0.351 | 0.104765 |
| 12.38 | 0.1447 | 0.097047 |  |  |  | 10.34 | -0.0793 | 0.091977 | 11.84 | -0.1618 | 0.110815 | 10.52 | 0.0842 | 0.102005 |
| 12.38 | 0.1202 | 0.093767 |  |  |  | 10.33 | -0.0574 | 0.095612 | 11.83 | -0.0406 | 0.103319 | 10.52 | 0.0647 | 0.097979 |
| 12.38 | -0.0199 | 0.105655 |  |  |  | 10.31 | 0.1267 | 0.096473 | 11.81 | 0.0222 | 0.110742 | 10.52 | 0.038 | 0.107862 |
| 12.38 | -0.0246 | 0.102525 |  |  |  | 10.31 | -0.0189 | 0.10008 | 11.81 | 0.0134 | 0.117883 | 10.52 | 0.0003 | 0.102973 |
| 12.38 | -0.0747 | 0.099681 |  |  |  | 10.3 | 0.1578 | 0.093699 | 11.81 | -0.0909 | 0.094336 | 10.52 | -0.0346 | 0.110909 |
| 12.38 | -0.4509 | 0.103717 |  |  |  | 10.3 | -0.1744 | 0.106766 | 11.81 | -0.1779 | 0.094474 | 10.51 | 0.0861 | 0.109321 |
| 12.37 | 0.0815 | 0.102397 |  |  |  | 10.29 | 0.014 | 0.099572 | 11.8 | -0.0154 | 0.107047 | 10.5 | 0.0466 | 0.101618 |
| 12.36 | 0.0323 | 0.101411 |  |  |  | 10.29 | 0.0002 | 0.102172 | 11.8 | -0.1852 | 0.105757 | 10.5 | 0.0003 | 0.102263 |
| 12.36 | 0.005 | 0.099527 |  |  |  | 10.29 | -0.0906 | 0.106968 | 11.79 | -0.0029 | 0.099465 | 10.49 | 0.3943 | 0.110864 |
| 12.36 | -0.0388 | 0.104722 |  |  |  | 10.29 | -0.6671 | 0.110849 | 11.79 | -0.0325 | 0.096963 | 10.49 | 0.0715 | 0.112266 |
| 12.36 | -0.0391 | 0.096659 |  |  |  | 10.27 | -0.0159 | 0.104108 | 11.79 | -0.0963 | 0.102628 | 10.49 | 0.0704 | 0.106756 |
| 12.35 | 0.012 | 0.108024 |  |  |  | 10.26 | -0.0016 | 0.104002 | 11.78 | 0.2382 | 0.1012 | 10.49 | 0.055 | 0.100988 |
| 12.35 | -0.0099 | 0.09932 |  |  |  | 10.26 | -0.0144 | 0.108049 | 11.78 | -0.0048 | 0.101258 | 10.49 | 0.0536 | 0.101615 |
| 12.35 | -0.0654 | 0.109496 |  |  |  | 10.24 | -0.2015 | 0.102006 | 11.78 | -0.2086 | 0.083718 | 10.49 | 0.0394 | 0.100878 |
| 12.35 | -0.1441 | 0.105478 |  |  |  | 10.24 | -0.7596 | 0.103461 | 11.77 | 0.0492 | 0.110445 | 10.49 | 0.0378 | 0.107164 |
| 12.34 | 0.7034 | 0.100722 |  |  |  | 10.23 | -0.0455 | 0.093662 | 11.77 | 0.0191 | 0.098039 | 10.49 | -0.0577 | 0.098673 |
| 12.34 | -0.0085 | 0.107366 |  |  |  | 10.23 | -0.7514 | 0.105605 | 11.77 | -0.029 | 0.097386 | 10.48 | 0.5843 | 0.104431 |
| 12.34 | -0.0246 | 0.109225 |  |  |  | 10.21 | -0.1179 | 0.100935 | 11.77 | -0.2431 | 0.102595 | 10.48 | 0.2533 | 0.100322 |
| 12.33 | 0.2265 | 0.102091 |  |  |  | 10.21 | -0.2427 | 0.100685 | 11.75 | 0.0107 | 0.095608 | 10.48 | 0.0383 | 0.102462 |
| 12.33 | 0.0087 | 0.106898 |  |  |  | 10.21 | -0.8014 | 0.095821 | 11.75 | -0.0162 | 0.10566 | 10.48 | 0.0032 | 0.105178 |
| 12.33 | -0.0111 | 0.107708 |  |  |  | 10.16 | -0.0436 | 0.093547 | 11.75 | -0.2112 | 0.106798 | 10.47 | 0.4705 | 0.107222 |
| 12.33 | -0.2107 | 0.100597 |  |  |  | 10.15 | -0.0498 | 0.102932 | 11.75 | -0.394 | 0.099737 | 10.47 | 0.0543 | 0.102519 |
| 12.33 | -0.393 | 0.105087 |  |  |  | 10.13 | 0.1047 | 0.100536 | 11.74 | 0.0171 | 0.105249 | 10.47 | 0.0439 | 0.105058 |
| 12.32 | 0.279 | 0.106852 |  |  |  | 10.11 | 0.0284 | 0.110977 | 11.74 | -0.0353 | 0.106498 | 10.47 | -0.0067 | 0.113465 |
| 12.32 | 0.0912 | 0.101725 |  |  |  | 10.1 | 0.3617 | 0.101816 | 11.73 | 0.0973 | 0.106295 | 10.46 | 0.381 | 0.107693 |
| 12.32 | 0.0524 | 0.103134 |  |  |  | 10.1 | 0.059 | 0.100556 | 11.73 | 0.0489 | 0.102111 | 10.46 | 0.0422 | 0.110827 |
| 12.32 | 0.0159 | 0.094882 |  |  |  | 10.1 | -0.0222 | 0.109491 | 11.73 | -0.0271 | 0.103307 | 10.46 | 0.0278 | 0.106396 |
| 12.32 | 0.0127 | 0.103868 |  |  |  | 10.09 | 0.1641 | 0.097915 | 11.72 | 0.0422 | 0.109077 | 10.46 | 0.0153 | 0.102608 |
| 12.32 | 0.0022 | 0.102838 |  |  |  | 10.08 | -0.0492 | 0.10282 | 11.72 | -0.2822 | 0.105092 | 10.45 | 0.0339 | 0.103191 |
| 12.32 | -0.0404 | 0.099852 |  |  |  | 10.07 | -0.0771 | 0.102317 | 11.72 | -0.6287 | 0.114246 | 10.45 | 0.031 | 0.109586 |
| 12.32 | -0.3906 | 0.101388 |  |  |  | 10.04 | -0.0481 | 0.112653 | 11.71 | 0.0321 | 0.100112 | 10.44 | 0.047 | 0.10974 |
| 12.31 | 0.147 | 0.09969 |  |  |  | 10.04 | -0.8326 | 0.115686 | 11.71 | -0.0256 | 0.110082 | 10.44 | 0.0458 | 0.10685 |
| 12.31 | 0.0265 | 0.103815 |  |  |  | 10.02 | -0.3164 | 0.113546 | 11.71 | -0.2652 | 0.098075 | 10.44 | 0.0339 | 0.11012 |
| 12.3 | 0.258 | 0.096604 |  |  |  | 10.01 | -0.6431 | 0.092342 | 11.7 | 0.129 | 0.103269 | 10.43 | 0.0737 | 0.103678 |
| 12.3 | 0.1032 | 0.107162 |  |  |  | 9.97 | 0.4399 | 0.098852 | 11.7 | 0.0027 | 0.097266 | 10.43 | 0.0537 | 0.100081 |
| 12.3 | 0.0259 | 0.102946 |  |  |  | 9.95 | 0.1756 | 0.098041 | 11.7 | 0.001 | 0.107823 | 10.43 | 0.0093 | 0.108805 |
| 12.29 | 0.3277 | 0.102303 |  |  |  | 9.91 | -0.0083 | 0.103652 | 11.7 | -0.0184 | 0.10481 | 10.42 | 0.4751 | 0.113083 |
| 12.29 | 0.1873 | 0.09821 |  |  |  | 9.91 | -0.0118 | 0.097806 | 11.69 | -0.1784 | 0.103229 | 10.42 | 0.0853 | 0.099829 |
| 12.29 | 0.06 | 0.103697 |  |  |  | 9.88 | -0.013 | 0.101883 | 11.68 | 0.4559 | 0.091702 | 10.42 | 0.0416 | 0.10614 |
| 12.29 | 0.042 | 0.09691 |  |  |  | 9.87 | 0.0115 | 0.101927 | 11.68 | -0.0068 | 0.104374 | 10.42 | 0.0407 | 0.106748 |
| 12.29 | 0.0245 | 0.093702 |  |  |  | 9.87 | -0.1016 | 0.110807 | 11.65 | -0.1547 | 0.104545 | 10.42 | 0.0343 | 0.107993 |
| 12.29 | -0.031 | 0.101559 |  |  |  | 9.86 | -0.5871 | 0.105087 | 11.64 | -0.0202 | 0.099717 | 10.42 | -0.002 | 0.108115 |
| 12.29 | -0.0504 | 0.10134 |  |  |  | 9.85 | 0.1355 | 0.099302 | 11.64 | -0.3167 | 0.102276 | 10.42 | -0.0233 | 0.110565 |
| 12.28 | 0.0058 | 0.104164 |  |  |  | 9.76 | -0.0112 | 0.103885 | 11.63 | -0.3733 | 0.109832 | 10.41 | 0.0101 | 0.101215 |
| 12.27 | 0.4014 | 0.106655 |  |  |  | 9.74 | -0.201 | 0.112622 | 11.63 | -0.4789 | 0.105922 | 10.4 | 0.115 | 0.110808 |
| 12.27 | 0.2549 | 0.103668 |  |  |  | 9.74 | -0.6618 | 0.099022 | 11.62 | 0.085 | 0.102902 | 10.4 | 0.082 | 0.100904 |
| 12.27 | 0.0634 | 0.094188 |  |  |  | 9.68 | -0.1743 | 0.100255 | 11.62 | -0.0106 | 0.102457 | 10.4 | 0.0743 | 0.101211 |
| 12.27 | 0.0464 | 0.09877 |  |  |  | 9.65 | 0.4403 | 0.095275 | 11.61 | 0.0431 | 0.104952 | 10.4 | 0.0125 | 0.103848 |
| 12.27 | 0.0268 | 0.099552 |  |  |  | 9.55 | -0.034 | 0.109141 | 11.61 | -0.1968 | 0.096335 | 10.4 | 0.0121 | 0.104642 |
| 12.26 | 0.0374 | 0.100286 |  |  |  | 9.29 | 0.3737 | 0.099515 | 11.6 | 0.0095 | 0.103428 | 10.39 | 0.0457 | 0.107489 |
| 12.26 | 0.0274 | 0.105154 |  |  |  | 8.85 | -0.7655 | 0.104594 | 11.6 | -0.0699 | 0.112856 | 10.39 | 0.0357 | 0.10305 |
| 12.26 | -0.0138 | 0.100992 |  |  |  |  |  |  | 11.6 | -0.2012 | 0.104799 | 10.39 | 0.0299 | 0.104556 |
| 12.25 | 0.4733 | 0.0869 |  |  |  |  |  |  | 11.59 | 0.2848 | 0.09899 | 10.39 | -0.0118 | 0.102839 |
| 12.25 | 0.0053 | 0.103945 |  |  |  |  |  |  | 11.59 | 0.156 | 0.112814 | 10.38 | 0.4638 | 0.101466 |
| 12.25 | -0.0047 | 0.103388 |  |  |  |  |  |  | 11.58 | 0.0342 | 0.106864 | 10.38 | 0.1941 | 0.11611 |
| 12.25 | -0.011 | 0.107017 |  |  |  |  |  |  | 11.58 | 0.0265 | 0.108975 | 10.38 | 0.0455 | 0.110367 |
| 12.25 | -0.1278 | 0.102554 |  |  |  |  |  |  | 11.57 | 0.3658 | 0.094646 | 10.37 | 0.5144 | 0.108998 |
| 12.24 | 0.3067 | 0.10011 |  |  |  |  |  |  | 11.57 | 0.0175 | 0.102815 | 10.37 | 0.3717 | 0.101348 |
| 12.24 | 0.302 | 0.109081 |  |  |  |  |  |  | 11.57 | 0.002 | 0.104085 | 10.37 | 0.0732 | 0.110088 |
| 12.24 | 0.2746 | 0.101868 |  |  |  |  |  |  | 11.57 | -0.2626 | 0.107172 | 10.36 | 0.0447 | 0.098744 |
| 12.24 | 0.0891 | 0.101611 |  |  |  |  |  |  | 11.53 | 0.0538 | 0.102575 | 10.36 | 0.0392 | 0.105164 |
| 12.24 | 0.0569 | 0.095964 |  |  |  |  |  |  | 11.53 | -0.4372 | 0.104196 | 10.35 | 0.3414 | 0.099545 |
| 12.24 | 0.0541 | 0.096031 |  |  |  |  |  |  | 11.53 | -0.5058 | 0.105951 | 10.35 | 0.2035 | 0.103867 |
| 12.24 | -0.0294 | 0.104812 |  |  |  |  |  |  | 11.52 | -0.0274 | 0.10193 | 10.35 | 0.1507 | 0.106756 |
| 12.24 | -0.1357 | 0.104939 |  |  |  |  |  |  | 11.52 | -0.0287 | 0.113757 | 10.34 | 0.4242 | 0.103978 |
| 12.23 | 0.3748 | 0.102582 |  |  |  |  |  |  | 11.52 | -0.0573 | 0.102535 | 10.34 | 0.1335 | 0.113016 |
| 12.23 | -0.028 | 0.096914 |  |  |  |  |  |  | 11.51 | 0.0442 | 0.102315 | 10.34 | 0.0969 | 0.103675 |
| 12.22 | 0.017 | 0.099785 |  |  |  |  |  |  | 11.51 | -0.0251 | 0.102478 | 10.34 | 0.0361 | 0.099157 |
| 12.22 | -0.002 | 0.108594 |  |  |  |  |  |  | 11.5 | 0.0114 | 0.110422 | 10.33 | 0.5205 | 0.104108 |
| 12.22 | -0.0256 | 0.099242 |  |  |  |  |  |  | 11.5 | -0.0398 | 0.099278 | 10.33 | 0.0866 | 0.103092 |
| 12.22 | -0.0573 | 0.101604 |  |  |  |  |  |  | 11.5 | -0.639 | 0.108172 | 10.33 | 0.0161 | 0.103777 |
| 12.22 | -0.3066 | 0.105195 |  |  |  |  |  |  | 11.49 | -0.0111 | 0.098845 | 10.32 | 0.0537 | 0.102318 |
| 12.21 | 0.5033 | 0.099791 |  |  |  |  |  |  | 11.49 | -0.0126 | 0.102278 | 10.32 | 0.051 | 0.102457 |
| 12.21 | 0.2877 | 0.096289 |  |  |  |  |  |  | 11.48 | 0.0046 | 0.115725 | 10.32 | 0.0446 | 0.099359 |
| 12.21 | 0.0565 | 0.09918 |  |  |  |  |  |  | 11.47 | 0.1621 | 0.106085 | 10.32 | 0.0421 | 0.103044 |
| 12.2 | 0.1569 | 0.103826 |  |  |  |  |  |  | 11.47 | 0.0179 | 0.103395 | 10.32 | 0.0313 | 0.098764 |
| 12.2 | 0.0266 | 0.099189 |  |  |  |  |  |  | 11.46 | 0.0036 | 0.106882 | 10.32 | 0.0155 | 0.104302 |
| 12.2 | 0.0257 | 0.111226 |  |  |  |  |  |  | 11.46 | -0.0404 | 0.10686 | 10.31 | 0.0191 | 0.099765 |
| 12.19 | 0.0529 | 0.098094 |  |  |  |  |  |  | 11.45 | 0.1841 | 0.10701 | 10.3 | 0.1324 | 0.109472 |
| 12.19 | 0.0307 | 0.101672 |  |  |  |  |  |  | 11.44 | 0.1479 | 0.093211 | 10.3 | 0.0714 | 0.105792 |
| 12.19 | -0.0194 | 0.101439 |  |  |  |  |  |  | 11.43 | 0.1917 | 0.112885 | 10.3 | 0.0648 | 0.10665 |
| 12.18 | 0.2528 | 0.098771 |  |  |  |  |  |  | 11.42 | -0.0374 | 0.108039 | 10.3 | 0.0449 | 0.10669 |
| 12.18 | 0.2344 | 0.10399 |  |  |  |  |  |  | 11.41 | 0.095 | 0.095291 | 10.3 | 0.0327 | 0.109811 |
| 12.18 | 0.0851 | 0.10169 |  |  |  |  |  |  | 11.41 | 0.0418 | 0.101773 | 10.3 | 0.0294 | 0.104066 |
| 12.18 | 0.0602 | 0.100699 |  |  |  |  |  |  | 11.41 | 0.0057 | 0.105456 | 10.29 | 0.0455 | 0.104995 |
| 12.18 | 0.0522 | 0.102938 |  |  |  |  |  |  | 11.41 | -0.0117 | 0.098573 | 10.29 | 0.0198 | 0.102655 |
| 12.18 | 0.0132 | 0.100167 |  |  |  |  |  |  | 11.41 | -0.6991 | 0.095848 | 10.29 | -0.0112 | 0.104213 |
| 12.18 | -0.0269 | 0.096642 |  |  |  |  |  |  | 11.4 | -0.0194 | 0.098532 | 10.28 | 0.4278 | 0.102725 |
| 12.18 | -0.547 | 0.106164 |  |  |  |  |  |  | 11.4 | -0.0504 | 0.105964 | 10.28 | 0.0657 | 0.106362 |
| 12.17 | 0.3686 | 0.095435 |  |  |  |  |  |  | 11.4 | -0.5344 | 0.101878 | 10.28 | 0.0532 | 0.104595 |
| 12.17 | 0.215 | 0.101454 |  |  |  |  |  |  | 11.39 | -0.0113 | 0.100973 | 10.27 | 0.0106 | 0.110107 |
| 12.17 | 0.0012 | 0.098702 |  |  |  |  |  |  | 11.39 | -0.0428 | 0.102879 | 10.26 | 0.1698 | 0.10289 |
| 12.16 | 0.199 | 0.103104 |  |  |  |  |  |  | 11.38 | -0.0456 | 0.10113 | 10.26 | 0.0812 | 0.102022 |
| 12.16 | 0.0626 | 0.150004 |  |  |  |  |  |  | 11.37 | 0.0387 | 0.109124 | 10.26 | 0.0138 | 0.106412 |
| 12.16 | 0.0133 | 0.148966 |  |  |  |  |  |  | 11.37 | 0.0355 | 0.103732 | 10.25 | 0.5383 | 0.107402 |
| 12.15 | 0.0895 | 0.100098 |  |  |  |  |  |  | 11.37 | 0.0315 | 0.101327 | 10.25 | 0.1775 | 0.106533 |
| 12.15 | 0.0789 | 0.09233 |  |  |  |  |  |  | 11.37 | -0.0149 | 0.100952 | 10.25 | 0.03 | 0.105028 |
| 12.15 | -0.0601 | 0.106659 |  |  |  |  |  |  | 11.36 | -0.0014 | 0.109955 | 10.24 | 0.0793 | 0.099518 |
| 12.15 | -0.0744 | 0.109552 |  |  |  |  |  |  | 11.35 | 0.0203 | 0.098098 | 10.24 | 0.0492 | 0.109978 |
| 12.14 | 0.0608 | 0.106546 |  |  |  |  |  |  | 11.35 | -0.1188 | 0.095952 | 10.24 | 0.0347 | 0.107445 |
| 12.14 | 0.0154 | 0.106722 |  |  |  |  |  |  | 11.35 | -0.3261 | 0.111522 | 10.24 | 0.0333 | 0.105118 |
| 12.14 | -0.107 | 0.102681 |  |  |  |  |  |  | 11.33 | 0.3656 | 0.102313 | 10.24 | -0.0015 | 0.10162 |
| 12.14 | -0.4435 | 0.098168 |  |  |  |  |  |  | 11.33 | 0.0546 | 0.10042 | 10.22 | 0.0416 | 0.108455 |
| 12.12 | -0.116 | 0.101625 |  |  |  |  |  |  | 11.33 | -0.0085 | 0.088955 | 10.22 | 0.0359 | 0.098036 |
| 12.11 | 0.1976 | 0.10117 |  |  |  |  |  |  | 11.3 | 0.098 | 0.10906 | 10.21 | 0.0706 | 0.104289 |
| 12.11 | 0.0685 | 0.09917 |  |  |  |  |  |  | 11.3 | 0.0042 | 0.104613 | 10.21 | 0.0287 | 0.101222 |
| 12.11 | 0.0095 | 0.096841 |  |  |  |  |  |  | 11.3 | -0.0742 | 0.113184 | 10.2 | 0.0754 | 0.099012 |
| 12.11 | 0.0024 | 0.103972 |  |  |  |  |  |  | 11.29 | 0.0648 | 0.100653 | 10.2 | 0.0254 | 0.108454 |
| 12.11 | -0.005 | 0.103417 |  |  |  |  |  |  | 11.29 | -0.1536 | 0.105467 | 10.2 | 0.0032 | 0.106515 |
| 12.11 | -0.0165 | 0.10266 |  |  |  |  |  |  | 11.27 | 0.0579 | 0.095067 | 10.2 | 0.0017 | 0.105668 |
| 12.11 | -0.0199 | 0.096998 |  |  |  |  |  |  | 11.27 | -0.1699 | 0.103838 | 10.19 | 0.0585 | 0.112095 |
| 12.1 | 0.1941 | 0.100699 |  |  |  |  |  |  | 11.26 | 0.0167 | 0.110151 | 10.19 | 0.0559 | 0.106244 |
| 12.1 | 0.1532 | 0.098281 |  |  |  |  |  |  | 11.26 | -0.0278 | 0.097232 | 10.19 | 0.0474 | 0.113705 |
| 12.1 | -0.0191 | 0.098853 |  |  |  |  |  |  | 11.26 | -0.0299 | 0.102932 | 10.19 | 0.0337 | 0.100177 |
| 12.1 | -0.0378 | 0.101318 |  |  |  |  |  |  | 11.26 | -0.0384 | 0.101351 | 10.19 | 0.0223 | 0.10287 |
| 12.1 | -0.0444 | 0.105634 |  |  |  |  |  |  | 11.26 | -0.2489 | 0.104079 | 10.19 | 0.0179 | 0.111763 |
| 12.1 | -0.1076 | 0.108441 |  |  |  |  |  |  | 11.25 | 0.0266 | 0.104547 | 10.18 | 0.0517 | 0.104429 |
| 12.1 | -0.2633 | 0.101988 |  |  |  |  |  |  | 11.25 | -0.0996 | 0.116371 | 10.18 | 0.0489 | 0.103552 |
| 12.09 | 0.2352 | 0.098108 |  |  |  |  |  |  | 11.24 | 0.0845 | 0.098517 | 10.18 | 0.0436 | 0.10272 |
| 12.09 | 0.097 | 0.098548 |  |  |  |  |  |  | 11.23 | 0.0516 | 0.099472 | 10.18 | 0.0243 | 0.100818 |
| 12.09 | 0.0285 | 0.106859 |  |  |  |  |  |  | 11.23 | -0.0931 | 0.101328 | 10.17 | 0.0373 | 0.106193 |
| 12.09 | -0.01 | 0.104235 |  |  |  |  |  |  | 11.22 | 0.1681 | 0.099615 | 10.17 | 0.0274 | 0.104905 |
| 12.09 | -0.0292 | 0.098195 |  |  |  |  |  |  | 11.21 | 0.0235 | 0.11037 | 10.17 | 0.014 | 0.100755 |
| 12.09 | -0.0883 | 0.100487 |  |  |  |  |  |  | 11.21 | -0.0526 | 0.098022 | 10.16 | 0.1025 | 0.099329 |
| 12.09 | -0.169 | 0.105295 |  |  |  |  |  |  | 11.21 | -0.2692 | 0.101322 | 10.16 | 0.0552 | 0.109668 |
| 12.09 | -0.1902 | 0.106068 |  |  |  |  |  |  | 11.21 | -0.297 | 0.096183 | 10.16 | 0.0524 | 0.106448 |
| 12.09 | -0.2616 | 0.107772 |  |  |  |  |  |  | 11.21 | -0.713 | 0.103948 | 10.16 | 0.0231 | 0.104104 |
| 12.08 | 0.4596 | 0.105408 |  |  |  |  |  |  | 11.17 | -0.2817 | 0.109854 | 10.15 | 0.13 | 0.100872 |
| 12.08 | 0.2816 | 0.105548 |  |  |  |  |  |  | 11.15 | -0.006 | 0.093996 | 10.14 | 0.1488 | 0.107945 |
| 12.08 | 0.2278 | 0.101006 |  |  |  |  |  |  | 11.15 | -0.1773 | 0.102551 | 10.14 | 0.0241 | 0.106675 |
| 12.08 | 0.1104 | 0.098028 |  |  |  |  |  |  | 11.14 | -0.5431 | 0.102042 | 10.14 | -0.0262 | 0.10595 |
| 12.08 | 0.0127 | 0.10299 |  |  |  |  |  |  | 11.13 | -0.0293 | 0.1053 | 10.13 | 0.0791 | 0.11165 |
| 12.08 | -0.0082 | 0.099885 |  |  |  |  |  |  | 11.13 | -0.0692 | 0.101122 | 10.13 | 0.0529 | 0.106272 |
| 12.08 | -0.0103 | 0.106549 |  |  |  |  |  |  | 11.12 | -0.0656 | 0.100845 | 10.13 | 0.0511 | 0.104718 |
| 12.08 | -0.042 | 0.097585 |  |  |  |  |  |  | 11.11 | 0.0434 | 0.100677 | 10.12 | 0.3956 | 0.100693 |
| 12.08 | -0.0938 | 0.103237 |  |  |  |  |  |  | 11.11 | -0.0049 | 0.111829 | 10.11 | 0.0836 | 0.100307 |
| 12.07 | 0.1169 | 0.106103 |  |  |  |  |  |  | 11.1 | -0.0011 | 0.107306 | 10.11 | 0.0637 | 0.105408 |
| 12.07 | 0.0181 | 0.105931 |  |  |  |  |  |  | 11.09 | 0.1296 | 0.103616 | 10.11 | 0.0157 | 0.102514 |
| 12.07 | 0.0136 | 0.095298 |  |  |  |  |  |  | 11.09 | 0.0836 | 0.10077 | 10.1 | 0.0682 | 0.100432 |
| 12.07 | -0.0449 | 0.100345 |  |  |  |  |  |  | 11.09 | 0.0677 | 0.100988 | 10.1 | 0.0187 | 0.104429 |
| 12.07 | -0.1721 | 0.100534 |  |  |  |  |  |  | 11.09 | -0.0776 | 0.109391 | 10.09 | 0.091 | 0.095639 |
| 12.06 | 0.1721 | 0.104785 |  |  |  |  |  |  | 11.09 | -0.2587 | 0.102418 | 10.09 | 0.0532 | 0.10724 |
| 12.06 | 0.0116 | 0.094803 |  |  |  |  |  |  | 11.07 | 0.0773 | 0.095845 | 10.09 | 0.0069 | 0.100769 |
| 12.05 | 0.1778 | 0.102103 |  |  |  |  |  |  | 11.05 | 0.2317 | 0.108292 | 10.09 | -0.0502 | 0.113278 |
| 12.05 | 0.1409 | 0.099112 |  |  |  |  |  |  | 11.05 | 0.1848 | 0.112436 | 10.08 | 0.078 | 0.108973 |
| 12.05 | 0.0633 | 0.147792 |  |  |  |  |  |  | 11.05 | -0.0526 | 0.09771 | 10.08 | 0.0461 | 0.104811 |
| 12.05 | 0.0149 | 0.103013 |  |  |  |  |  |  | 11.05 | -0.1168 | 0.101396 | 10.08 | -0.0866 | 0.105938 |
| 12.05 | 0.0037 | 0.106423 |  |  |  |  |  |  | 11.04 | -0.0487 | 0.107375 | 10.07 | 0.0924 | 0.101441 |
| 12.05 | -0.0168 | 0.123837 |  |  |  |  |  |  | 11.04 | -0.0688 | 0.101214 | 10.07 | 0.0279 | 0.107736 |
| 12.04 | 0.0355 | 0.099185 |  |  |  |  |  |  | 11.04 | -0.4117 | 0.10324 | 10.07 | 0.0189 | 0.100682 |
| 12.04 | 0.0306 | 0.098374 |  |  |  |  |  |  | 11.01 | 0.0188 | 0.103217 | 10.07 | -0.0036 | 0.104466 |
| 12.04 | -0.0013 | 0.105861 |  |  |  |  |  |  | 11.01 | 0.0156 | 0.104422 | 10.06 | 0.0539 | 0.109635 |
| 12.04 | -0.0134 | 0.104489 |  |  |  |  |  |  | 10.99 | -0.4472 | 0.106806 | 10.06 | 0.0477 | 0.110676 |
| 12.04 | -0.1712 | 0.098491 |  |  |  |  |  |  | 10.97 | 0.1305 | 0.098962 | 10.06 | 0.0319 | 0.103589 |
| 12.03 | 0.1976 | 0.099331 |  |  |  |  |  |  | 10.97 | 0.0026 | 0.099647 | 10.06 | 0.004 | 0.105475 |
| 12.03 | 0.1393 | 0.100175 |  |  |  |  |  |  | 10.96 | -0.2494 | 0.107381 | 10.05 | 0.0627 | 0.114686 |
| 12.03 | 0.0944 | 0.099696 |  |  |  |  |  |  | 10.96 | -0.4008 | 0.107545 | 10.05 | -0.0011 | 0.099502 |
| 12.03 | 0.091587644 | 0.09945 |  |  |  |  |  |  | 10.95 | -0.0615 | 0.103946 | 10.04 | -0.3608 | 0.111652 |
| 12.03 | 0.0734 | 0.099362 |  |  |  |  |  |  | 10.94 | -0.029 | 0.110795 | 10.03 | 0.0426 | 0.115717 |
| 12.02 | 0.0383 | 0.094954 |  |  |  |  |  |  | 10.94 | -0.2608 | 0.102227 | 10.03 | 0.0221 | 0.109224 |
| 12.02 | 0.0339 | 0.102729 |  |  |  |  |  |  | 10.92 | 0.1763 | 0.101057 | 10.03 | 0.0049 | 0.105109 |
| 12.02 | -0.0952 | 0.101682 |  |  |  |  |  |  | 10.92 | 0.0406 | 0.104034 | 10.02 | 0.1015 | 0.101221 |
| 12.01 | 0.1516 | 0.108097 |  |  |  |  |  |  | 10.91 | -0.4256 | 0.103963 | 10.02 | 0.0438 | 0.099545 |
| 12 | 0.0448 | 0.101477 |  |  |  |  |  |  | 10.9 | 0.0235 | 0.105962 | 10.02 | 0.0395 | 0.105517 |
| 12 | -0.0365 | 0.142169 |  |  |  |  |  |  | 10.9 | 0.0166 | 0.09798 | 10.02 | 0.0335 | 0.099586 |
| 11.99 | 0.2997 | 0.099355 |  |  |  |  |  |  | 10.88 | 0.0336 | 0.101036 | 10.02 | 0.0119 | 0.105165 |
| 11.99 | 0.0246 | 0.105092 |  |  |  |  |  |  | 10.87 | 0.0242 | 0.104656 | 10.02 | -0.0025 | 0.105652 |
| 11.99 | -0.0046 | 0.097487 |  |  |  |  |  |  | 10.86 | 0.1915 | 0.103629 | 10.01 | 0.0322 | 0.101076 |
| 11.99 | -0.0048 | 0.103761 |  |  |  |  |  |  | 10.86 | 0.0131 | 0.103367 | 10.01 | 0.0209 | 0.103922 |
| 11.99 | -0.1585 | 0.099976 |  |  |  |  |  |  | 10.84 | -0.3288 | 0.099561 | 10.01 | 0.0094 | 0.099736 |
| 11.98 | 0.0578 | 0.101278 |  |  |  |  |  |  | 10.78 | -0.0137 | 0.106422 | 10 | 0.0759 | 0.104265 |
| 11.98 | 0.0339 | 0.104885 |  |  |  |  |  |  | 10.76 | 0.0097 | 0.107998 | 10 | 0.0194 | 0.098119 |
| 11.98 | 0.0226 | 0.102862 |  |  |  |  |  |  | 10.73 | -0.6447 | 0.104345 | 9.98 | 0.0117 | 0.107539 |
| 11.98 | -0.0008 | 0.098086 |  |  |  |  |  |  | 10.66 | 0.2628 | 0.103449 | 9.97 | 0.4746 | 0.098312 |
| 11.98 | -0.2306 | 0.100179 |  |  |  |  |  |  | 10.59 | 0.0104 | 0.096652 | 9.96 | 0.0659 | 0.105508 |
| 11.97 | 0.1994 | 0.106131 |  |  |  |  |  |  | 10.58 | 0.0534 | 0.101092 | 9.96 | 0.0651 | 0.100841 |
| 11.97 | 0.0163 | 0.100315 |  |  |  |  |  |  | 10.57 | 0.2589 | 0.099603 | 9.95 | 0.0008 | 0.108846 |
| 11.97 | -0.0288 | 0.095425 |  |  |  |  |  |  | 10.57 | -0.3993 | 0.101932 | 9.93 | 0.2918 | 0.095869 |
| 11.97 | -0.2617 | 0.104111 |  |  |  |  |  |  | 10.55 | -0.0159 | 0.104861 | 9.93 | 0.0399 | 0.104667 |
| 11.96 | 0.0134 | 0.098636 |  |  |  |  |  |  | 10.51 | -0.1634 | 0.103696 | 9.9 | 0.0825 | 0.101657 |
| 11.96 | -0.0854 | 0.100002 |  |  |  |  |  |  | 10.5 | -0.6161 | 0.104706 | 9.89 | 0.0323 | 0.101841 |
| 11.96 | -0.1879 | 0.100288 |  |  |  |  |  |  | 10.49 | -0.1324 | 0.109004 | 9.88 | 0.0273 | 0.104721 |
| 11.95 | 0.331 | 0.108448 |  |  |  |  |  |  | 10.42 | -0.2877 | 0.098872 | 9.85 | 0.0464 | 0.103479 |
| 11.95 | 0.0316 | 0.094437 |  |  |  |  |  |  | 10.38 | -0.0491 | 0.105245 | 9.85 | 0.0304 | 0.099546 |
| 11.95 | -0.0515 | 0.098016 |  |  |  |  |  |  | 10.38 | -0.0878 | 0.108365 | 9.84 | 0.0578 | 0.100749 |
| 11.94 | 0.0559 | 0.10456 |  |  |  |  |  |  | 10.35 | -0.0118 | 0.105528 | 9.82 | 0.0405 | 0.10259 |
| 11.94 | 0.0556 | 0.101352 |  |  |  |  |  |  | 10.34 | -0.0333 | 0.113238 | 9.82 | 0.0129 | 0.108748 |
| 11.94 | 0.0543 | 0.104512 |  |  |  |  |  |  | 10.29 | -0.0038 | 0.100486 | 9.8 | 0.0466 | 0.105193 |
| 11.94 | 0.0397 | 0.102666 |  |  |  |  |  |  | 10.23 | -0.0331 | 0.103438 | 9.77 | 0.164 | 0.104658 |
| 11.94 | 0.0071 | 0.10607 |  |  |  |  |  |  | 10.22 | -0.5821 | 0.106568 | 9.76 | 0.0883 | 0.102982 |
| 11.94 | 0.0067 | 0.099567 |  |  |  |  |  |  | 10.21 | -0.0418 | 0.106345 | 9.74 | 0.1817 | 0.111515 |
| 11.94 | -0.054 | 0.102695 |  |  |  |  |  |  | 10.11 | -0.4942 | 0.102645 | 9.73 | 0.3654 | 0.101127 |
| 11.93 | 0.3407 | 0.145168 |  |  |  |  |  |  | 10.09 | -0.5708 | 0.103508 | 9.73 | 0.0809 | 0.103689 |
| 11.93 | 0.1641 | 0.095688 |  |  |  |  |  |  | 10.05 | -0.5827 | 0.099275 | 9.69 | 0.0417 | 0.098747 |
| 11.93 | 0.0342 | 0.09751 |  |  |  |  |  |  | 10.03 | -0.4098 | 0.095345 | 9.69 | 0.0105 | 0.101554 |
| 11.93 | -0.0003 | 0.09976 |  |  |  |  |  |  | 9.92 | 0.0639 | 0.103692 | 9.62 | -0.0637 | 0.102808 |
| 11.93 | -0.2141 | 0.098879 |  |  |  |  |  |  | 9.8 | -0.7689 | 0.103187 | 9.61 | 0.1186 | 0.098944 |
| 11.93 | -0.3307 | 0.100538 |  |  |  |  |  |  | 9.76 | -0.4507 | 0.104043 | 9.28 | 0.0651 | 0.101955 |
| 11.92 | 0.2843 | 0.100342 |  |  |  |  |  |  | 9.42 | -0.0636 | 0.099779 | 9.26 | 0.075 | 0.100362 |
| 11.92 | -0.0211 | 0.09682 |  |  |  |  |  |  |  |  |  | 9.12 | 0.0393 | 0.111555 |
| 11.92 | -0.0385 | 0.097891 |  |  |  |  |  |  |  |  |  |  |  |  |
| 11.91 | 0.2336 | 0.100092 |  |  |  |  |  |  |  |  |  |  |  |  |
| 11.91 | 0.1923 | 0.103358 |  |  |  |  |  |  |  |  |  |  |  |  |
| 11.91 | 0.1892 | 0.102077 |  |  |  |  |  |  |  |  |  |  |  |  |
| 11.91 | 0.0921 | 0.093105 |  |  |  |  |  |  |  |  |  |  |  |  |
| 11.91 | -0.003 | 0.104571 |  |  |  |  |  |  |  |  |  |  |  |  |
| 11.9 | 0.3967 | 0.103054 |  |  |  |  |  |  |  |  |  |  |  |  |
| 11.9 | 0.2948 | 0.098523 |  |  |  |  |  |  |  |  |  |  |  |  |
| 11.9 | 0.0071 | 0.105002 |  |  |  |  |  |  |  |  |  |  |  |  |
| 11.9 | -0.0156 | 0.109177 |  |  |  |  |  |  |  |  |  |  |  |  |
| 11.89 | -0.0723 | 0.105482 |  |  |  |  |  |  |  |  |  |  |  |  |
| 11.88 | 0.2523 | 0.097734 |  |  |  |  |  |  |  |  |  |  |  |  |
| 11.88 | 0.1202 | 0.105803 |  |  |  |  |  |  |  |  |  |  |  |  |
| 11.88 | 0.0393 | 0.102861 |  |  |  |  |  |  |  |  |  |  |  |  |
| 11.88 | 0.0212 | 0.098167 |  |  |  |  |  |  |  |  |  |  |  |  |
| 11.88 | 0.0037 | 0.101411 |  |  |  |  |  |  |  |  |  |  |  |  |
| 11.87 | 0.2926 | 0.096156 |  |  |  |  |  |  |  |  |  |  |  |  |
| 11.87 | 0.2288 | 0.112408 |  |  |  |  |  |  |  |  |  |  |  |  |
| 11.87 | 0.0213 | 0.100603 |  |  |  |  |  |  |  |  |  |  |  |  |
| 11.87 | -0.0221 | 0.100253 |  |  |  |  |  |  |  |  |  |  |  |  |
| 11.87 | -0.0413 | 0.101428 |  |  |  |  |  |  |  |  |  |  |  |  |
| 11.87 | -0.1727 | 0.103384 |  |  |  |  |  |  |  |  |  |  |  |  |
| 11.86 | 0.02 | 0.106463 |  |  |  |  |  |  |  |  |  |  |  |  |
| 11.86 | 0.0159 | 0.105142 |  |  |  |  |  |  |  |  |  |  |  |  |
| 11.85 | 0.0843 | 0.107892 |  |  |  |  |  |  |  |  |  |  |  |  |
| 11.85 | 0.0364 | 0.106528 |  |  |  |  |  |  |  |  |  |  |  |  |
| 11.85 | 0.0179 | 0.101962 |  |  |  |  |  |  |  |  |  |  |  |  |
| 11.85 | 0.0019 | 0.101598 |  |  |  |  |  |  |  |  |  |  |  |  |
| 11.85 | -0.0077 | 0.098023 |  |  |  |  |  |  |  |  |  |  |  |  |
| 11.85 | -0.2115 | 0.096263 |  |  |  |  |  |  |  |  |  |  |  |  |
| 11.85 | -0.5802 | 0.110375 |  |  |  |  |  |  |  |  |  |  |  |  |
| 11.84 | 0.0929 | 0.10932 |  |  |  |  |  |  |  |  |  |  |  |  |
| 11.84 | -0.515 | 0.095796 |  |  |  |  |  |  |  |  |  |  |  |  |
| 11.83 | 0.1733 | 0.107935 |  |  |  |  |  |  |  |  |  |  |  |  |
| 11.82 | -0.0137 | 0.102077 |  |  |  |  |  |  |  |  |  |  |  |  |
| 11.81 | 0.1912 | 0.103702 |  |  |  |  |  |  |  |  |  |  |  |  |
| 11.81 | 0.0919 | 0.102886 |  |  |  |  |  |  |  |  |  |  |  |  |
| 11.81 | 0.0354 | 0.105666 |  |  |  |  |  |  |  |  |  |  |  |  |
| 11.81 | 0.0267 | 0.097861 |  |  |  |  |  |  |  |  |  |  |  |  |
| 11.81 | 0.0083 | 0.10434 |  |  |  |  |  |  |  |  |  |  |  |  |
| 11.8 | 0.0037 | 0.098452 |  |  |  |  |  |  |  |  |  |  |  |  |
| 11.79 | 0.3982 | 0.142157 |  |  |  |  |  |  |  |  |  |  |  |  |
| 11.79 | 0.1996 | 0.103392 |  |  |  |  |  |  |  |  |  |  |  |  |
| 11.79 | 0.105 | 0.096204 |  |  |  |  |  |  |  |  |  |  |  |  |
| 11.79 | 0.0548 | 0.104921 |  |  |  |  |  |  |  |  |  |  |  |  |
| 11.79 | 0.0443 | 0.104538 |  |  |  |  |  |  |  |  |  |  |  |  |
| 11.79 | 0.0034 | 0.104413 |  |  |  |  |  |  |  |  |  |  |  |  |
| 11.79 | -0.3774 | 0.106799 |  |  |  |  |  |  |  |  |  |  |  |  |
| 11.78 | 0.3372 | 0.094371 |  |  |  |  |  |  |  |  |  |  |  |  |
| 11.78 | 0.0364 | 0.100405 |  |  |  |  |  |  |  |  |  |  |  |  |
| 11.78 | -0.021 | 0.101128 |  |  |  |  |  |  |  |  |  |  |  |  |
| 11.77 | 0.1968 | 0.094542 |  |  |  |  |  |  |  |  |  |  |  |  |
| 11.77 | 0.0486 | 0.104804 |  |  |  |  |  |  |  |  |  |  |  |  |
| 11.77 | -0.0038 | 0.103578 |  |  |  |  |  |  |  |  |  |  |  |  |
| 11.77 | -0.0066 | 0.101482 |  |  |  |  |  |  |  |  |  |  |  |  |
| 11.77 | -0.0198 | 0.107508 |  |  |  |  |  |  |  |  |  |  |  |  |
| 11.76 | 0.0051 | 0.10708 |  |  |  |  |  |  |  |  |  |  |  |  |
| 11.76 | 0.0048 | 0.107577 |  |  |  |  |  |  |  |  |  |  |  |  |
| 11.76 | -0.1339 | 0.107791 |  |  |  |  |  |  |  |  |  |  |  |  |
| 11.75 | -0.005 | 0.101877 |  |  |  |  |  |  |  |  |  |  |  |  |
| 11.75 | -0.0957 | 0.096149 |  |  |  |  |  |  |  |  |  |  |  |  |
| 11.74 | 0.4151 | 0.097852 |  |  |  |  |  |  |  |  |  |  |  |  |
| 11.74 | 0.3124 | 0.098254 |  |  |  |  |  |  |  |  |  |  |  |  |
| 11.74 | 0.0728 | 0.111222 |  |  |  |  |  |  |  |  |  |  |  |  |
| 11.74 | -0.0132 | 0.110518 |  |  |  |  |  |  |  |  |  |  |  |  |
| 11.74 | -0.0391 | 0.104405 |  |  |  |  |  |  |  |  |  |  |  |  |
| 11.74 | -0.05 | 0.098238 |  |  |  |  |  |  |  |  |  |  |  |  |
| 11.73 | 0.0639 | 0.098934 |  |  |  |  |  |  |  |  |  |  |  |  |
| 11.73 | 0.0511 | 0.100291 |  |  |  |  |  |  |  |  |  |  |  |  |
| 11.72 | 0.1885 | 0.097408 |  |  |  |  |  |  |  |  |  |  |  |  |
| 11.72 | -0.0089 | 0.09832 |  |  |  |  |  |  |  |  |  |  |  |  |
| 11.72 | -0.0515 | 0.104681 |  |  |  |  |  |  |  |  |  |  |  |  |
| 11.72 | -0.1459 | 0.11011 |  |  |  |  |  |  |  |  |  |  |  |  |
| 11.71 | 0.2927 | 0.103395 |  |  |  |  |  |  |  |  |  |  |  |  |
| 11.71 | 0.1338 | 0.102991 |  |  |  |  |  |  |  |  |  |  |  |  |
| 11.71 | 0.006 | 0.097266 |  |  |  |  |  |  |  |  |  |  |  |  |
| 11.7 | 0.002 | 0.106465 |  |  |  |  |  |  |  |  |  |  |  |  |
| 11.7 | -0.0717 | 0.109829 |  |  |  |  |  |  |  |  |  |  |  |  |
| 11.69 | 0.1915 | 0.10254 |  |  |  |  |  |  |  |  |  |  |  |  |
| 11.69 | 0.1213 | 0.101923 |  |  |  |  |  |  |  |  |  |  |  |  |
| 11.69 | -0.0167 | 0.107948 |  |  |  |  |  |  |  |  |  |  |  |  |
| 11.68 | -0.0235 | 0.115344 |  |  |  |  |  |  |  |  |  |  |  |  |
| 11.68 | -0.3541 | 0.101753 |  |  |  |  |  |  |  |  |  |  |  |  |
| 11.66 | 0.0024 | 0.107758 |  |  |  |  |  |  |  |  |  |  |  |  |
| 11.66 | -0.0113 | 0.102535 |  |  |  |  |  |  |  |  |  |  |  |  |
| 11.66 | -0.0191 | 0.103553 |  |  |  |  |  |  |  |  |  |  |  |  |
| 11.65 | 0.0146 | 0.096018 |  |  |  |  |  |  |  |  |  |  |  |  |
| 11.65 | -0.0133 | 0.106212 |  |  |  |  |  |  |  |  |  |  |  |  |
| 11.65 | -0.6927 | 0.107144 |  |  |  |  |  |  |  |  |  |  |  |  |
| 11.64 | 0.0597 | 0.100232 |  |  |  |  |  |  |  |  |  |  |  |  |
| 11.64 | -0.0758 | 0.100403 |  |  |  |  |  |  |  |  |  |  |  |  |
| 11.63 | -0.0864 | 0.100155 |  |  |  |  |  |  |  |  |  |  |  |  |
| 11.62 | 0.2734 | 0.108468 |  |  |  |  |  |  |  |  |  |  |  |  |
| 11.62 | 0.0478 | 0.096592 |  |  |  |  |  |  |  |  |  |  |  |  |
| 11.62 | -0.0001 | 0.098986 |  |  |  |  |  |  |  |  |  |  |  |  |
| 11.62 | -0.0218 | 0.107731 |  |  |  |  |  |  |  |  |  |  |  |  |
| 11.62 | -0.2723 | 0.102121 |  |  |  |  |  |  |  |  |  |  |  |  |
| 11.61 | 0.1384 | 0.099364 |  |  |  |  |  |  |  |  |  |  |  |  |
| 11.61 | 0.0472 | 0.099714 |  |  |  |  |  |  |  |  |  |  |  |  |
| 11.61 | -0.022 | 0.102885 |  |  |  |  |  |  |  |  |  |  |  |  |
| 11.6 | 0.0293 | 0.105136 |  |  |  |  |  |  |  |  |  |  |  |  |
| 11.6 | 0.006 | 0.104518 |  |  |  |  |  |  |  |  |  |  |  |  |
| 11.59 | 0.1044 | 0.107598 |  |  |  |  |  |  |  |  |  |  |  |  |
| 11.59 | -0.0206 | 0.107496 |  |  |  |  |  |  |  |  |  |  |  |  |
| 11.57 | -0.0054 | 0.103374 |  |  |  |  |  |  |  |  |  |  |  |  |
| 11.56 | 0.0366 | 0.108112 |  |  |  |  |  |  |  |  |  |  |  |  |
| 11.54 | 0.2361 | 0.099518 |  |  |  |  |  |  |  |  |  |  |  |  |
| 11.54 | 0.221 | 0.102661 |  |  |  |  |  |  |  |  |  |  |  |  |
| 11.54 | 0.0973 | 0.10744 |  |  |  |  |  |  |  |  |  |  |  |  |
| 11.54 | -0.0261 | 0.105346 |  |  |  |  |  |  |  |  |  |  |  |  |
| 11.53 | 0.304 | 0.105685 |  |  |  |  |  |  |  |  |  |  |  |  |
| 11.53 | -0.0012 | 0.096782 |  |  |  |  |  |  |  |  |  |  |  |  |
| 11.52 | -0.2479 | 0.103236 |  |  |  |  |  |  |  |  |  |  |  |  |
| 11.5 | 0.0669 | 0.104634 |  |  |  |  |  |  |  |  |  |  |  |  |
| 11.49 | 0.0824 | 0.106548 |  |  |  |  |  |  |  |  |  |  |  |  |
| 11.49 | 0.0191 | 0.097545 |  |  |  |  |  |  |  |  |  |  |  |  |
| 11.49 | -0.0054 | 0.105568 |  |  |  |  |  |  |  |  |  |  |  |  |
| 11.49 | -0.0058 | 0.104181 |  |  |  |  |  |  |  |  |  |  |  |  |
| 11.49 | -0.0136 | 0.096929 |  |  |  |  |  |  |  |  |  |  |  |  |
| 11.48 | 0.0947 | 0.106841 |  |  |  |  |  |  |  |  |  |  |  |  |
| 11.48 | 0.0923 | 0.107745 |  |  |  |  |  |  |  |  |  |  |  |  |
| 11.48 | -0.0018 | 0.097107 |  |  |  |  |  |  |  |  |  |  |  |  |
| 11.48 | -0.0154 | 0.098176 |  |  |  |  |  |  |  |  |  |  |  |  |
| 11.48 | -0.0554 | 0.094339 |  |  |  |  |  |  |  |  |  |  |  |  |
| 11.48 | -0.7659 | 0.10637 |  |  |  |  |  |  |  |  |  |  |  |  |
| 11.47 | 0.0231 | 0.110363 |  |  |  |  |  |  |  |  |  |  |  |  |
| 11.47 | 0.0054 | 0.102459 |  |  |  |  |  |  |  |  |  |  |  |  |
| 11.47 | -0.0058 | 0.103738 |  |  |  |  |  |  |  |  |  |  |  |  |
| 11.46 | 0.13 | 0.102198 |  |  |  |  |  |  |  |  |  |  |  |  |
| 11.46 | 0.0317 | 0.103402 |  |  |  |  |  |  |  |  |  |  |  |  |
| 11.46 | -0.3819 | 0.101991 |  |  |  |  |  |  |  |  |  |  |  |  |
| 11.45 | 0.2511 | 0.105822 |  |  |  |  |  |  |  |  |  |  |  |  |
| 11.45 | 0.2048 | 0.099883 |  |  |  |  |  |  |  |  |  |  |  |  |
| 11.45 | 0.0777 | 0.100634 |  |  |  |  |  |  |  |  |  |  |  |  |
| 11.45 | 0.0031 | 0.109316 |  |  |  |  |  |  |  |  |  |  |  |  |
| 11.44 | 0.031 | 0.103327 |  |  |  |  |  |  |  |  |  |  |  |  |
| 11.44 | 0.0047 | 0.101237 |  |  |  |  |  |  |  |  |  |  |  |  |
| 11.44 | -0.0007 | 0.099259 |  |  |  |  |  |  |  |  |  |  |  |  |
| 11.42 | 0.5056 | 0.096949 |  |  |  |  |  |  |  |  |  |  |  |  |
| 11.42 | 0.158 | 0.112067 |  |  |  |  |  |  |  |  |  |  |  |  |
| 11.42 | 0.0008 | 0.103975 |  |  |  |  |  |  |  |  |  |  |  |  |
| 11.42 | -0.01 | 0.108175 |  |  |  |  |  |  |  |  |  |  |  |  |
| 11.41 | -0.0018 | 0.101398 |  |  |  |  |  |  |  |  |  |  |  |  |
| 11.41 | -0.0482 | 0.106 |  |  |  |  |  |  |  |  |  |  |  |  |
| 11.41 | -0.1097 | 0.102329 |  |  |  |  |  |  |  |  |  |  |  |  |
| 11.41 | -0.1151 | 0.105772 |  |  |  |  |  |  |  |  |  |  |  |  |
| 11.4 | 0.0125 | 0.095998 |  |  |  |  |  |  |  |  |  |  |  |  |
| 11.39 | 0.1402 | 0.101005 |  |  |  |  |  |  |  |  |  |  |  |  |
| 11.39 | 0.1069 | 0.107947 |  |  |  |  |  |  |  |  |  |  |  |  |
| 11.39 | 0.0253 | 0.096521 |  |  |  |  |  |  |  |  |  |  |  |  |
| 11.38 | 0.3164 | 0.110217 |  |  |  |  |  |  |  |  |  |  |  |  |
| 11.38 | 0.1933 | 0.099759 |  |  |  |  |  |  |  |  |  |  |  |  |
| 11.38 | 0.0576 | 0.101756 |  |  |  |  |  |  |  |  |  |  |  |  |
| 11.38 | 0.0342 | 0.104583 |  |  |  |  |  |  |  |  |  |  |  |  |
| 11.38 | 0.022 | 0.108703 |  |  |  |  |  |  |  |  |  |  |  |  |
| 11.38 | -0.0396 | 0.101556 |  |  |  |  |  |  |  |  |  |  |  |  |
| 11.38 | -0.054 | 0.106281 |  |  |  |  |  |  |  |  |  |  |  |  |
| 11.38 | -0.9006 | 0.109845 |  |  |  |  |  |  |  |  |  |  |  |  |
| 11.37 | -0.0041 | 0.105749 |  |  |  |  |  |  |  |  |  |  |  |  |
| 11.36 | -0.0035 | 0.100324 |  |  |  |  |  |  |  |  |  |  |  |  |
| 11.36 | -0.0159 | 0.109612 |  |  |  |  |  |  |  |  |  |  |  |  |
| 11.35 | 0.2503 | 0.110956 |  |  |  |  |  |  |  |  |  |  |  |  |
| 11.35 | -0.4195 | 0.105161 |  |  |  |  |  |  |  |  |  |  |  |  |
| 11.34 | -0.0176 | 0.108824 |  |  |  |  |  |  |  |  |  |  |  |  |
| 11.34 | -0.8215 | 0.106068 |  |  |  |  |  |  |  |  |  |  |  |  |
| 11.33 | 0.1765 | 0.099387 |  |  |  |  |  |  |  |  |  |  |  |  |
| 11.33 | -0.0013 | 0.105499 |  |  |  |  |  |  |  |  |  |  |  |  |
| 11.33 | -0.0083 | 0.105096 |  |  |  |  |  |  |  |  |  |  |  |  |
| 11.33 | -0.5317 | 0.103304 |  |  |  |  |  |  |  |  |  |  |  |  |
| 11.32 | 0.3389 | 0.103036 |  |  |  |  |  |  |  |  |  |  |  |  |
| 11.3 | 0.186 | 0.104039 |  |  |  |  |  |  |  |  |  |  |  |  |
| 11.3 | 0.0252 | 0.102235 |  |  |  |  |  |  |  |  |  |  |  |  |
| 11.29 | -0.0059 | 0.108615 |  |  |  |  |  |  |  |  |  |  |  |  |
| 11.29 | -0.0069 | 0.096533 |  |  |  |  |  |  |  |  |  |  |  |  |
| 11.28 | -0.4143 | 0.101912 |  |  |  |  |  |  |  |  |  |  |  |  |
| 11.27 | 0.1578 | 0.104016 |  |  |  |  |  |  |  |  |  |  |  |  |
| 11.27 | 0.084 | 0.102479 |  |  |  |  |  |  |  |  |  |  |  |  |
| 11.27 | -0.0002 | 0.106987 |  |  |  |  |  |  |  |  |  |  |  |  |
| 11.27 | -0.0089 | 0.102928 |  |  |  |  |  |  |  |  |  |  |  |  |
| 11.27 | -0.0306 | 0.102696 |  |  |  |  |  |  |  |  |  |  |  |  |
| 11.26 | 0.003 | 0.106097 |  |  |  |  |  |  |  |  |  |  |  |  |
| 11.24 | 0.0466 | 0.104022 |  |  |  |  |  |  |  |  |  |  |  |  |
| 11.24 | 0.0232 | 0.107913 |  |  |  |  |  |  |  |  |  |  |  |  |
| 11.23 | 0.3601 | 0.096441 |  |  |  |  |  |  |  |  |  |  |  |  |
| 11.23 | 0.046 | 0.096707 |  |  |  |  |  |  |  |  |  |  |  |  |
| 11.22 | -0.0411 | 0.105696 |  |  |  |  |  |  |  |  |  |  |  |  |
| 11.21 | 0.0414 | 0.098048 |  |  |  |  |  |  |  |  |  |  |  |  |
| 11.19 | 0.0006 | 0.099536 |  |  |  |  |  |  |  |  |  |  |  |  |
| 11.18 | -0.0038 | 0.103502 |  |  |  |  |  |  |  |  |  |  |  |  |
| 11.17 | 0.0205 | 0.100018 |  |  |  |  |  |  |  |  |  |  |  |  |
| 11.17 | 0.0003 | 0.100299 |  |  |  |  |  |  |  |  |  |  |  |  |
| 11.17 | -0.001 | 0.108305 |  |  |  |  |  |  |  |  |  |  |  |  |
| 11.16 | -0.032 | 0.105262 |  |  |  |  |  |  |  |  |  |  |  |  |
| 11.14 | 0.1262 | 0.100773 |  |  |  |  |  |  |  |  |  |  |  |  |
| 11.14 | 0.0057 | 0.101625 |  |  |  |  |  |  |  |  |  |  |  |  |
| 11.11 | 0.0882 | 0.104768 |  |  |  |  |  |  |  |  |  |  |  |  |
| 11.1 | 0.2587 | 0.099875 |  |  |  |  |  |  |  |  |  |  |  |  |
| 11.1 | 0.2477 | 0.103264 |  |  |  |  |  |  |  |  |  |  |  |  |
| 11.1 | -0.014 | 0.103629 |  |  |  |  |  |  |  |  |  |  |  |  |
| 11.09 | -0.0054 | 0.107239 |  |  |  |  |  |  |  |  |  |  |  |  |
| 11.09 | -0.068 | 0.102107 |  |  |  |  |  |  |  |  |  |  |  |  |
| 11.09 | -0.6489 | 0.109811 |  |  |  |  |  |  |  |  |  |  |  |  |
| 11.08 | 0.2351 | 0.101829 |  |  |  |  |  |  |  |  |  |  |  |  |
| 11.08 | 0.0277 | 0.105007 |  |  |  |  |  |  |  |  |  |  |  |  |
| 11.08 | 0.0111 | 0.102552 |  |  |  |  |  |  |  |  |  |  |  |  |
| 11.06 | -0.0238 | 0.106542 |  |  |  |  |  |  |  |  |  |  |  |  |
| 11.06 | -0.6063 | 0.103312 |  |  |  |  |  |  |  |  |  |  |  |  |
| 11.05 | 0.0215 | 0.110815 |  |  |  |  |  |  |  |  |  |  |  |  |
| 11.05 | -0.0021 | 0.096508 |  |  |  |  |  |  |  |  |  |  |  |  |
| 11.03 | 0.0037 | 0.109064 |  |  |  |  |  |  |  |  |  |  |  |  |
| 11.02 | 0.149 | 0.101174 |  |  |  |  |  |  |  |  |  |  |  |  |
| 11 | 0.1549 | 0.098788 |  |  |  |  |  |  |  |  |  |  |  |  |
| 10.99 | 0.0136 | 0.102837 |  |  |  |  |  |  |  |  |  |  |  |  |
| 10.99 | -0.0003 | 0.098078 |  |  |  |  |  |  |  |  |  |  |  |  |
| 10.97 | 0.0079 | 0.102526 |  |  |  |  |  |  |  |  |  |  |  |  |
| 10.97 | -0.0104 | 0.105156 |  |  |  |  |  |  |  |  |  |  |  |  |
| 10.96 | 0.0213 | 0.098707 |  |  |  |  |  |  |  |  |  |  |  |  |
| 10.96 | -0.4075 | 0.094106 |  |  |  |  |  |  |  |  |  |  |  |  |
| 10.95 | -0.2263 | 0.090761 |  |  |  |  |  |  |  |  |  |  |  |  |
| 10.95 | -0.5214 | 0.1022 |  |  |  |  |  |  |  |  |  |  |  |  |
| 10.93 | 0.0083 | 0.099424 |  |  |  |  |  |  |  |  |  |  |  |  |
| 10.92 | 0.4324 | 0.096925 |  |  |  |  |  |  |  |  |  |  |  |  |
| 10.92 | -0.1607 | 0.09944 |  |  |  |  |  |  |  |  |  |  |  |  |
| 10.91 | 0.0139 | 0.101305 |  |  |  |  |  |  |  |  |  |  |  |  |
| 10.89 | 0.0614 | 0.105707 |  |  |  |  |  |  |  |  |  |  |  |  |
| 10.88 | 0.1826 | 0.100115 |  |  |  |  |  |  |  |  |  |  |  |  |
| 10.86 | 0.0637 | 0.094741 |  |  |  |  |  |  |  |  |  |  |  |  |
| 10.86 | 0.0261 | 0.101732 |  |  |  |  |  |  |  |  |  |  |  |  |
| 10.86 | -0.0019 | 0.103588 |  |  |  |  |  |  |  |  |  |  |  |  |
| 10.86 | -0.0163 | 0.103775 |  |  |  |  |  |  |  |  |  |  |  |  |
| 10.82 | -0.0216 | 0.103234 |  |  |  |  |  |  |  |  |  |  |  |  |
| 10.82 | -0.0297 | 0.107881 |  |  |  |  |  |  |  |  |  |  |  |  |
| 10.81 | 0.0051 | 0.100414 |  |  |  |  |  |  |  |  |  |  |  |  |
| 10.8 | 0.2414 | 0.094854 |  |  |  |  |  |  |  |  |  |  |  |  |
| 10.79 | -0.2333 | 0.109244 |  |  |  |  |  |  |  |  |  |  |  |  |
| 10.77 | 0.0094 | 0.101212 |  |  |  |  |  |  |  |  |  |  |  |  |
| 10.77 | -0.0034 | 0.108063 |  |  |  |  |  |  |  |  |  |  |  |  |
| 10.76 | -0.008 | 0.100692 |  |  |  |  |  |  |  |  |  |  |  |  |
| 10.75 | -0.0191 | 0.092718 |  |  |  |  |  |  |  |  |  |  |  |  |
| 10.73 | 0.0009 | 0.106921 |  |  |  |  |  |  |  |  |  |  |  |  |
| 10.73 | -0.2498 | 0.123475 |  |  |  |  |  |  |  |  |  |  |  |  |
| 10.72 | 0.0498 | 0.106692 |  |  |  |  |  |  |  |  |  |  |  |  |
| 10.72 | -0.0003 | 0.111803 |  |  |  |  |  |  |  |  |  |  |  |  |
| 10.72 | -0.1919 | 0.105981 |  |  |  |  |  |  |  |  |  |  |  |  |
| 10.66 | 0.0826 | 0.09432 |  |  |  |  |  |  |  |  |  |  |  |  |
| 10.65 | 0.0214 | 0.100051 |  |  |  |  |  |  |  |  |  |  |  |  |
| 10.65 | 0.0009 | 0.106512 |  |  |  |  |  |  |  |  |  |  |  |  |
| 10.63 | 0.0181 | 0.102386 |  |  |  |  |  |  |  |  |  |  |  |  |
| 10.63 | -0.0227 | 0.106608 |  |  |  |  |  |  |  |  |  |  |  |  |
| 10.61 | -0.3699 | 0.115012 |  |  |  |  |  |  |  |  |  |  |  |  |
| 10.3 | 0.3016 | 0.107168 |  |  |  |  |  |  |  |  |  |  |  |  |
| 10.03 | -0.2414 | 0.107752 |  |  |  |  |  |  |  |  |  |  |  |  |
| 10.01 | -0.0048 | 0.108386 |  |  |  |  |  |  |  |  |  |  |  |  |
| 8.67 | -0.2537 | 0.111142 |  |  |  |  |  |  |  |  |  |  |  |  |
